1 **Multistage and transmission-blocking targeted antimalarials discovered from the open-**  
2 **source MMV Pandemic Response Box**

3 *Janette Reader*<sup>1a</sup>, *Mariëtte E. van der Watt*<sup>1a</sup>, *Dale Taylor*<sup>2</sup>, *Claire Le Manach*<sup>2</sup>, *Nimisha*  
4 *Mittal*<sup>3</sup>, *Sabine Otilie*<sup>3</sup>, *Anjo Theron*<sup>4</sup>, *Phanankosi Moyo*<sup>1</sup>, *Erica Erlank*<sup>5</sup>, *Luisa Nardini*<sup>5</sup>,  
5 *Nelius Venter*<sup>5</sup>, *Sonja Lauterbach*<sup>6</sup>, *Belinda Bezuidenhout*<sup>6</sup>, *Andre Horatscheck*<sup>2</sup>, *Ashleigh*  
6 *van Heerden*<sup>1</sup>, *Grant A. Boyle*<sup>2</sup>, *David Calvo*<sup>7</sup>, *Dalu Mancama*<sup>4</sup>, *Theresa L. Coetzer*<sup>6</sup>,  
7 *Elizabeth A. Winzeler*<sup>3</sup>, *James Duffy*<sup>8</sup>, *Lizette L. Koekemoer*<sup>4</sup>, *Gregory Basarab*<sup>2</sup>, *Kelly*  
8 *Chibale*<sup>2,9</sup>, *Lyn-Marié Birkholtz*<sup>1</sup>

9 <sup>1</sup> Department of Biochemistry, Genetics and Microbiology, Institute for Sustainable Malaria  
10 Control, University of Pretoria, Hatfield, Pretoria 0028, South Africa

11 <sup>2</sup> Drug Discovery and Development Centre (H3D), University of Cape Town, Rondebosch  
12 7701, South Africa

13 <sup>3</sup> Division of Host-Microbe Systems & Therapeutics, Department of Pediatrics, University of  
14 California San Diego, La Jolla, California 92093-076, USA

15 <sup>4</sup> Next Generation Health, Council for Scientific and Industrial Research, PO Box 395, Pretoria  
16 0001, South Africa

17 <sup>5</sup> Wits Research Institute for Malaria, School of Pathology, Faculty of Health Sciences,  
18 University of the Witwatersrand, and Centre for Emerging Zoonotic and Parasitic Diseases,  
19 National Institute for Communicable Diseases of the National Health Laboratory Service,  
20 Johannesburg, 2193, South Africa

21 <sup>6</sup> Department of Molecular Medicine and Hematology, Wits Research Institute for Malaria,  
22 School of Pathology, Faculty of Health Sciences, University of the Witwatersrand,  
23 Johannesburg, 2193, South Africa

24 <sup>7</sup> Global Health Incubator Unit, GlaxoSmithKline (GSK), Severo Ochoa, 2, 28760, Tres  
25 Cantos, Madrid, Spain

26 <sup>8</sup> Medicines for Malaria Venture, International Center Cointrin, Route de Pré-Bois 20, 1215,  
27 Geneva, Switzerland

28 <sup>9</sup> South African Medical Research Council, Drug Discovery and Development Research Unit,  
29 Department of Chemistry and Institute of Infectious Disease and Molecular Medicine,  
30 University of Cape Town, Rondebosch 7701, South Africa

31

32 <sup>a</sup> These authors contributed equally

33 \* Corresponding Author: Department of Biochemistry, Genetics and Microbiology, University  
34 of Pretoria, Private Bag x20, Hatfield, Pretoria 0028, South Africa

35 Tel.: +27 12 420 2479; Fax: +27 12 362 5302. E-mail address: [lbirkholtz@up.ac.za](mailto:lbirkholtz@up.ac.za)

36

37 **Running title:** Antimalarial profiling of the MMV Pandemic Response Box

38 **Abstract**

39

40 New chemical matter is needed to target the divergent biology associated with the different  
41 life cycle stages of *Plasmodium*. Here, we report the parallel screening of the Medicines for  
42 Malaria Venture Pandemic Response Box to identify multistage-active and stage-specific  
43 compounds against various life cycle stages of *Plasmodium* parasites (asexual parasites,  
44 stage IV/V gametocytes, gametes, oocysts and liver stages) and for endectocidal activity. Hits  
45 displayed unique chemotypes and included two multistage-active compounds, 16 asexual-  
46 targeted, six with prophylactic potential and ten gametocyte-targeted compounds. Notably,  
47 four structurally diverse gametocyte-targeted compounds with potent transmission-blocking  
48 activity were identified: the JmjC inhibitor ML324, two azole antifungals including  
49 eberconazole, and the antitubercular clinical candidate SQ109. Besides ML324, none of these  
50 have previously attributed antiplasmodial activity, emphasizing the success of *de novo* parallel  
51 screening against different *Plasmodium* stages to deliver leads with novel modes-of-action.  
52 Importantly, the discovery of such transmission-blocking targeted compounds covers a  
53 previously unexplored base for delivery of compounds required for malaria elimination  
54 strategies.

55

## 56 INTRODUCTION

57 Malaria treatment solely relies on drugs that target the parasite but current treatment options  
58 have a finite lifespan due to resistance development. Moreover, whilst current antimalarials  
59 are curative of asexual blood stage parasitemia and associated malaria symptoms, they  
60 cannot all be used prophylactically and typically do not effectively block transmission. This  
61 limits their utility in malaria elimination strategies, where the latter dictates that chemotypes  
62 should block human-to-mosquito (gametocyte and gametes) and mosquito-to-human  
63 (sporozoites and liver schizonts) transmission.

64 The transmission stages of malaria parasites are seen as parasite population  
65 bottlenecks,<sup>1</sup> with as few as 100 sporozoites able to initiate an infection after migrating to the  
66 liver where exoerythrocytic schizogony occurs. The subsequent release of thousands of  
67 daughter cells, which in turn infect erythrocytes, initiates the extensive population expansion  
68 that occurs during asexual replication. A minor proportion ( $\sim 1\%$ )<sup>2</sup> of the proliferating asexual  
69 parasites will undergo sexual differentiation to form mature stage V gametocytes, a 10-14 day  
70 process in the most virulent parasite *Plasmodium falciparum*. Only  $\sim 10^3$  of these falciform-  
71 shaped mature gametocytes are taken up by the next feeding mosquito to transform into male  
72 and female gametes in the mosquito's midgut.<sup>3</sup> Fertilization results in zygote development,  
73 and a motile ookinete that passes through the midgut wall forms an oocyst from which  
74 sporozoites develop, making the mosquito infectious.

75 The sporozoite and gametocyte population bottlenecks have been the basis of enticing  
76 arguments towards the development of chemotypes able to target them. However, most  
77 compounds able to kill asexual parasites are either ineffective in preventing infection (hepatic  
78 development) and blocking transmission (gametocytogenesis) or are compromised by  
79 resistance development (e.g. antifolates active as prophylactics). Some compounds also have  
80 toxicity concerns (e.g. primaquine targeting gametocytes with associated hemolytic toxicity in  
81 glucose-6-phosphate dehydrogenase deficient patients). Patients treated with current  
82 antimalarials or asymptomatic carriers, may have sufficient levels of gametocytes that can be  
83 transmitted to the mosquito and sustain the malaria burden. The development of gametocyte-  
84 targeted transmission-blocking compounds is therefore essential for a complete strategy  
85 directed at eliminating malaria.

86 Phenotypic screenings of millions of compounds have successfully identified new  
87 antimalarial hits to populate the drug discovery pipeline. However, the majority of these  
88 screens assessed activity against asexual blood stage parasites as the primary filter, and hits  
89 were only profiled thereafter for activity against additional life cycle stages. Whilst this strategy  
90 can identify compounds targeting two or more life cycle stages, it does not allow *de novo*  
91 discovery of compounds with selective activity against specific life cycle stages such as  
92 gametocytes. Parallel screening against multiple life cycle stages would best identify such

93 compounds. These efforts rely on selective and predictive assays for gametocytocidal  
94 activity,<sup>4</sup> transmission-blocking,<sup>5, 6</sup> and hepatic development.<sup>7</sup> Moreover, identifying stage-  
95 specific compounds will allow the divergent cell biology associated with the different life cycle  
96 states to be targeted.<sup>5, 6, 8</sup> Recently, parallel screening of diversity sets has resulted in reports  
97 of such stage-specific compounds.<sup>7, 9, 10, 11</sup>

98 The Medicines for Malaria Venture (MMV) Pandemic Response Box (PRB) (in  
99 partnership with DNDi) is a collection of 400 drug-like compounds stratified by antibacterial,  
100 antiviral or antifungal activity (201, 153 and 46 compounds, respectively), with some  
101 compounds having antineoplastic activity. The unique and diverse nature of the compounds  
102 in the box allow one to explore and target the unique biology in the different life cycle stages  
103 to identify new chemical starting points for antimalarial development. We describe here the  
104 parallel screen of the MMV PRB on different life cycle stages of *Plasmodium* including asexual  
105 stage parasites, liver stage parasites, mature (stage IV/V) gametocytes, male gametes and  
106 oocysts (Figure 1). Finally, active compounds were screened for endectocidal activity against  
107 mosquitoes. All screens were performed on the human parasite *P. falciparum*, except for the  
108 liver stages, where the established *P. berghei* assay was used.<sup>12, 13</sup> Hit selection and  
109 progression of compounds in our screening cascade was not biased towards activity on any  
110 single life cycle stage, allowing the discovery of multistage-active scaffolds and those with  
111 stage-specific activity. Importantly, we report the profiling of a subset of compounds as new  
112 transmission-blocking molecules that would not have been identified in a test cascade that  
113 began solely with an asexual blood stage assay. Four transmission-targeted leads include  
114 compounds that are chemically tractable, with good physicochemical properties and novel  
115 modes-of-action, amenable to development as transmission-blocking antimalarials.

116

## 117 **RESULTS**

### 118 **Parallel screening of the PRB reveals hits against multiple life cycle stages**

119 To identify active compounds against different stages of the *P. falciparum* life cycle  
120 (irrespective of their activity against the other life cycle stages), the PRB was screened in  
121 parallel against asexual *PfNF54*, stage IV/V gametocytes from *PfNF54* and *P. berghei* liver  
122 stages (Figure 1). To validate the *PfNF54* stage IV/V gametocyte data, we orthogonally  
123 screened all compounds on three independent gametocyte assay platforms to confirm that hit  
124 selection (compounds active on at least 2 platforms) was independent of assay readout.<sup>4</sup>  
125 Primary hits were identified with a relatively lenient but inclusive cut-off of  $\geq 50\%$  inhibition (at  
126 2  $\mu\text{M}$  for asexual stages and 5  $\mu\text{M}$  for gametocytes and liver stages, the latter at  $>60\%$  cut-  
127 off). Asexual stage activity was confirmed against drug resistant *PfDd2* asexual parasites.  
128 Cytotoxicity filtering was applied after evaluation of the  $\text{IC}_{50}$ , and transmission-blocking

129 potential of compounds with gametocytocidal activity was confirmed by inhibition of male  
130 gamete exflagellation and in a standard membrane feeding assay (SMFA).

131 An 18% hit rate was obtained against *Pf*NF54 asexual parasites, 12% against *Pf*NF54  
132 stage IV/V gametocytes and 11% against liver stages (Figure 2A, Supplementary file S1).  
133 Although a number of compounds showed activity against all these life cycle stages, stage-  
134 specific differentiation was evident, as exemplified by the overrepresentation of antifungal  
135 compounds in the hit pool for stage IV/V gametocytes compared to asexual parasites (Figure  
136 2B). The remaining hits reflect the distribution of the compounds in the MMV PRB, with the  
137 highest number of hits classified as antibacterials followed by antivirals. The latter seemed to  
138 be more potent (as a % of the hits) on *Pf*NF54 stage IV/V gametocytes relative to *Pf*NF54  
139 asexual parasites. Only four compounds showed marked toxicity against CHO cells (<50%  
140 viability at 2  $\mu$ M, supplementary Fig. S1). There is little overlap of the compounds in the box  
141 with typical antimalarial scaffolds identified to date, as shown by the superimposition of the  
142 PRB chemical space on the current antimalarial drug within the launched drugs chemical  
143 space (Supplementary Fig. S2).

144 Based on the target indicators / biological pathway descriptors available for the  
145 compounds in the PRB in other diseases, *Pf*NF54 asexual hits were enriched for inhibitors of  
146 kinases, CYP450, energy metabolism and DNA synthesis. Inhibitors of dihydrofolate  
147 reductase (DHFR, antifolates), dihydroorotate dehydrogenase (DHODH), proton pumps and  
148 topoisomerase were exclusively hits for *Pf*NF54 asexual parasites and liver stages.  
149 Compounds with both *Pf*NF54 asexual and gametocyte activity include antithrombotics,  
150 protease inhibitors, sphingosine-1-phosphate receptor modulators and compounds affecting  
151 redox homeostasis, whereas inhibitors of MmpL3 (mycobacterial membrane protein large 3)  
152 and ion channels were predominant in gametocyte hits (Figure 2C). Interestingly, well known  
153 antimicrobials (e.g. thalidomide, isoniazid and saquinavir) were not active in our screens.  
154 Chemical classes highly represented in the hit pool include quinolines, benzamides/benzoids  
155 and azoles.

### 156 **Novel multistage-active compounds**

157 All hit compounds were counter screened against either CHO or HepG2 mammalian cells to  
158 remove cytotoxic compounds (supplementary file S2). Of the 72 MMV PRB hits with *Pf*NF54  
159 activity (>50% at 2  $\mu$ M), 23 were active with IC<sub>50</sub> values <2  $\mu$ M. An additional five compounds  
160 were active on *Pf*Dd2 (Figure 2A, supplementary file S2). Of these 28 compounds, 16 were  
161 exclusively active against the asexual stages (Figure 3A). Of the 51 hits active against *Pf*NF54  
162 stage IV/V gametocytes, 18 compounds had IC<sub>50</sub> values <2  $\mu$ M. Eight shared activity against  
163 asexual stages but ten had gametocyte stage-specific activity (Figure 3A). Only six  
164 compounds showed activity against *P. berghei* liver stages (<2  $\mu$ M). Notably, two compounds  
165 were active (IC<sub>50</sub>  $\leq$  2  $\mu$ M) against all life cycle stages: the peptidomimetic antitumor agent

166 MMV1557856 (Birinapant), a second mitochondrial-derived activator of caspases (SMAC)  
167 mimetic inhibitor of apoptosis protein (IAP) family members<sup>14</sup>; and the imidazoquinoline  
168 antitumor agent MMV1580483 (AZD-0156), a DNA-damage signaling kinase inhibitor (Ataxia  
169 Telangiectasia Mutated kinase) (Figure 3B).

#### 170 **New asexual parasite specific chemotypes**

171 Encouragingly, the 28 compounds with asexual parasite activity (Supplementary file S2)  
172 included the known antimalarial compounds chloroquine (MMV000008) and tafenoquine  
173 (MMV000043), which were both present in the MMV PRB and showed IC<sub>50</sub>s comparable to  
174 those previously reported<sup>6</sup> (30 nM and 940 nM, respectively), validating the screening process  
175 (Figure 4). The most potent of the 28 compounds was an antibacterial diaminopyridine  
176 propargyl-linked antifolate,<sup>15</sup> MMV1580844 (IC<sub>50</sub> = 0.0017 μM), which targets DHFR in  
177 mammalian and yeast cells.<sup>16, 17</sup> It also showed activity against *P. berghei* liver stages (0.004  
178 μM). As there was no activity against PfNF54 stage IV/V gametocytes, our data concur that  
179 inhibition of *Plasmodium* DHFR is only important to asexual and liver stage schizogony.<sup>6</sup>  
180 MMV1580844 had a pronounced (63-fold) loss of activity against the antifolate  
181 (pyrimethamine) resistant PfDd2 line. By contrast, the quinazoline antifolate trimetrexate  
182 (MMV1580173, derived from methotrexate) was potently active against PfDd2 (IC<sub>50</sub> = 0.108  
183 μM) as well as *P. berghei* liver stages (IC<sub>50</sub> = 0.0005 μM), in both instances with more than  
184 10-fold selectivity towards the parasite versus CHO cells. As with MMV1580844,  
185 MMV1580173 did not display any gametocytocidal activity.

186 The majority (13/16) of the asexual-specific compounds have not been previously  
187 reported with antiplasmodial activity, nor do they show structural similarity to any other  
188 compounds with antiplasmodial activity, as highlighted by the absence of overlap between the  
189 two chemical spaces (hits and antimalarial drugs) (Figure 4, supplementary Fig. S2). Activity  
190 was confirmed for MMV687800 (Clrofazimine, IC<sub>50</sub> = 0.88 μM), MMV1578574 (eravacycline,  
191 IC<sub>50</sub> = 1.5 μM) and MMV011565 (IC<sub>50</sub> = 1.78 μM), all with previously described antiplasmodial  
192 activity in PubChem (<https://pubchem.ncbi.nlm.nih.gov/>). Interestingly, the majority of the  
193 asexual-specific compounds are classified as antibacterials and include two kinase inhibitors,  
194 MMV1593539 (IC<sub>50</sub> = 0.686 μM), a pyruvate kinase inhibitor, and MMV1580482 (URMC-099-  
195 C, IC<sub>50</sub> = 1.3 μM), a mixed lineage kinase 3 (MLK3) inhibitor. Additionally, there is pibenzimol  
196 (MMV020752, IC<sub>50</sub> = 0.149 μM) a disrupter of DNA replication and MMV019724 (IC<sub>50</sub> = 1.67  
197 μM), an antiviral lactate dehydrogenase inhibitor.

#### 198 **Liver stage activity is associated with asexual parasite activity**

199 Six dual stage compounds (asexual blood stage and *P. berghei* liver stage activity ≤ 2 μM)  
200 were identified in the MMV PRB, marking them as having prophylactic potential (IC<sub>50</sub> range  
201 from 0.0005 – 1.72 μM, Figure 4). These compounds include previously described antifolates  
202 (MMV1580173 and MMV1580844) but also the ribonucleotide reductase inhibitor

203 MMV1580496 (triapine) and the bacterial methionyl-tRNA synthetase inhibitor MMV1578884  
204 (REP3123) in addition to the multistage-active compounds, AZD-0156 and Birinapant.

### 205 **Unique compounds with stage-specific activity against IV/V gametocytes**

206 Eighteen compounds were active ( $IC_{50}s < 2 \mu M$ ) against late stage gametocytes, without  
207 showing toxicity to mammalian cells, as confirmed in at least two of the three orthogonal  
208 assays (ATP, PrestoBlue<sup>®</sup> or luciferase reporter assays, Supplementary file S2). Of these,  
209 eight compounds shared asexual parasite activity, but more importantly, ten compounds  
210 selectively inhibited *PfNF54* stage IV/V gametocyte viability ( $>10$ -fold difference in  $IC_{50}$   
211 between gametocytocidal and asexual activity) with  $IC_{50}s < 0.5 \mu M$  (Figure 5). The most potent  
212 compound was the antineoplastic epidrug ML324<sup>18</sup> (MMV1580488,  $IC_{50} = 0.077 \mu M$ ) that  
213 targets jumonji domain demethylases (KDM4). There was also a marked selection for  
214 structurally unrelated compounds that bind G-protein coupled receptors (GPCRs) and related  
215 transmembrane proteins (Figure 5A). These include MMV1581558 ( $IC_{50} = 0.130 \mu M$ ) and two  
216 inhibitors of MmpL3: the well characterized 1,2-ethylene diamine antitubercular clinical  
217 candidate SQ109<sup>19, 20, 21</sup> (MMV687273,  $IC_{50} = 0.105 \mu M$ ) and a rimonabant derivative  
218 MMV1580843<sup>22</sup> ( $IC_{50} = 0.108 \mu M$ ). Since MmpL3 inhibitors act rapidly in mycobacteria and  
219 trypanosomatids,<sup>21, 23</sup> we evaluated the gametocytocidal action of MMV687273 and  
220 MMV1580843 for 12, 24 and 48 h (Figure 5B), with no significant difference ( $p=0.937$  and  
221  $p=0.558$ , respectively; one-way ANOVA, DF=2, n=3) observed in the  $IC_{50}$  values, indicating  
222 activity within 12 h of exposure to gametocytes. Moreover, the activity of MMV687273 (SQ109)  
223 was similar to *S,S*-ethambutol.2HCl<sup>20</sup> (MMV687801) whereas 2-adamantanamine  
224 (MMV180402) was inactive (Figure 5C).

225 Two imidazole antifungals showed potent activity against gametocytes (Figure 5D),  
226 though they differed structurally. MMV1634491 was  $>10$ -fold more active against gametocytes  
227 ( $IC_{50} = 0.208 \mu M$ ) than against *PfNF54* asexual parasites ( $IC_{50} = 2.6 \mu M$ ) while MMV1634492,  
228 the topical antifungal eberconazole, showed more equipotent activity ( $IC_{50}s = 0.23$  and  $0.15$   
229  $\mu M$ , respectively). Eberconazole targets sterol biosynthesis by inhibiting lanosterol 14 $\alpha$ -  
230 demethylase CYP51<sup>24</sup>, as likely does MMV1634491 based on structural similarity with other  
231 azole antifungals.<sup>25</sup>

### 232 **Gametocytocidal compounds target male gametes**

233 The transmission-blocking activity of gametocytocidal hits was validated on male gametes, as  
234 these display increased sensitivity to compounds.<sup>26</sup> A functional male gamete exflagellation  
235 inhibition assay was performed in carry-over format, where compounds ( $2 \mu M$ ) were added to  
236 mature gametocytes for 48 h before male gamete exflagellation was induced and measured  
237 <sup>27</sup> (Figure 6A). The majority of compounds (14) inhibited male gamete exflagellation by  $>60\%$ ,  
238 11 of which were potent at  $\geq 80\%$  inhibition. The latter included the gametocyte-targeted



239 compounds MMV1580488 (ML324), the azole antifungals MMV1634491 and MMV1634492  
240 and the MmpL3 inhibitors MMV1580843 and MMV687273, as well as compounds with  
241 additional asexual parasite activity, i.e. MMV1580483, MMV396785, MMV1582495,  
242 MMV1578570 and MMV1581558.

243 To determine if the compounds also directly targeted gametes, the assay was repeated  
244 both in 'washout' format (48 h drug pressure on gametocytes, after which male gamete  
245 exflagellation was induced in the absence of compound) and in a 'direct' format, where  
246 compounds were only added during exflagellation induction.<sup>27</sup> All the compounds except for  
247 MMV1578570 retained activity in the washout experiment, indicating that their  
248 gametocytocidal activity was irreversible (Supplementary Fig. S3). Five compounds (the  
249 epidrug MMV1580488, the two azole antifungals MMV1634491, MMV1634492, a quinoline  
250 MMV1634399, and the two MmpL3 inhibitors MMV1580843, MMV687273) retained activity  
251 on male gametes in the direct format, implying that shared essential biology between these  
252 stages is being targeted (Figure 6A).

### 253 **Novel chemotypes with confirmed transmission-blocking activity**

254 The final confirmatory step of transmission-blocking is the mosquito-based SMFA,<sup>28, 29, 30</sup>  
255 which was performed using an African malaria vector, *An. coluzzii* (G3). Females were fed on  
256 a blood meal infected with *Pf*NF54 late stage gametocytes and treated with selected  
257 compounds that displayed >50% male gamete exflagellation activity at 2  $\mu$ M. TRA (reduction  
258 in oocyst intensity) and TBA (reduction in oocyst prevalence) were determined after 8-10 days  
259 (Figure 6B, supplementary File S3). Total sample size for the control feeds averaged at 53  
260 mosquitoes, with average oocyst prevalence at 71% and oocyst intensity of 5.8  
261 oocysts/midgut. The TRA for MMV000043 (Tafenoquine) at 77% correlates well with previous  
262 reports on *An. stephensi*,<sup>31</sup> validating assay performance with *An. coluzzii*. All the compounds  
263 evaluated reduced TRA by >60% (except for MMV1580853) and, remarkably, nine  
264 compounds had  $\geq$ 80% TRA. Four gametocyte-targeted compounds MMV1006203 (1,1-  
265 dioxide 1-Thioflavone), the azole antifungal MMV1634492, a quinoline MMV1634399 and the  
266 GPCR inhibitor MMV1581558 were able to block transmission (TBA) by  $\geq$ 60% (MMV1634492  
267 by 79%), associated with a significant reduction in oocyst intensity ( $p < 0.05$ , supplementary  
268 File S3) of these structurally dissimilar compounds.

### 269 **Endectocidal activity**

270 The compounds with transmission-blocking potential were additionally evaluated for their  
271 activity as endectocides, killing mosquitoes after being supplied in a blood meal. However,  
272 none of the compounds produced significant mortality (one-way ANOVA,  $p = 0.7005$ , total  
273 DF=71,  $n \geq 2$ ) in the 4-day mortality assay at 2  $\mu$ M compared to DMSO as control under these  
274 conditions (supplementary Fig. S4). Rather, moderate killing (~30%) was observed for the two

275 MmpL3 inhibitors MMV687273 (SQ109) and MMV1580843, the GPCR inhibitor  
276 MMV1581558, AZD-0156 (MMV1580483) and MMV1174026, marking these compounds with  
277 a potential to kill the parasite as well as the mosquito vector. Interestingly, all these compounds  
278 also had >60% reduction of TRA in addition to their potential endectocidal activity.

279

## 280 **DISCUSSION**

281 The ability to quickly respond to pandemics has become of paramount importance, and  
282 compound sets like the MMV PRB provide an essential tool to support rapid screening of  
283 diverse druggable compounds for potential repurposing. Indeed, antimalarials have previously  
284 been investigated as antineoplastics<sup>32, 33</sup> and hydroxychloroquine/chloroquine are currently  
285 undergoing clinical evaluation for the treatment of Covid-19. Conversely, several antibiotics  
286 and antifungals have previously demonstrated antimalarial activities.<sup>34, 35</sup> Here, we screened  
287 the MMV PRB across multiple *Plasmodium* stages and identified chemical matter with  
288 antimalarial activity not previously described, providing a useful resource to the research  
289 community for drug repurposing.

290 Multistage activity is a preferential attribute for the next generation of antimalarials,<sup>36</sup>  
291 but such compounds are rarely found in diversity library screens, in large part due to targeted  
292 screening approaches rather than parallel screening in multiple assays. We identified two non-  
293 cytotoxic multistage-active compounds in the PRB (Birinapant and AZD-0156), that could point  
294 to biological parsimony of conserved targets in all these stages, essential to the survival of the  
295 parasite. Both compounds inhibit proteins involved in cellular stress responses by either  
296 inducing apoptosis or preventing DNA damage recovery responses. Interestingly, Birinapant  
297 has recently been shown to preferentially kill *Plasmodium*-infected hepatocytes (attributed to  
298 reducing host cellular IAP) but did not affect asexual stage parasitemia in a *P. berghei* mouse  
299 model.<sup>37</sup> It would be imperative to determine what proteins are targeted by these compounds  
300 in the different life cycle stages and to understand the reasons for the differences in  
301 parasitemia seen *in vitro* herein and *in vivo* previously.

302 The dual-active asexual and liver stage compounds identified in the PRB have the  
303 potential for prophylactic and chemoprotective utility (target candidate profile 4, TCP-4), in  
304 addition to being chemotherapeutically relevant (target candidate profile 1, TCP-1).<sup>36</sup> Though  
305 compounds targeting the same parasite protein in both liver and asexual stages have the  
306 associated risk of target-based resistance, the smaller number of parasites in the liver stage  
307 reduces this risk. However, with compounds like the ribonucleotide reductase inhibitor  
308 MMV1580496 (triapine), there is the added issue of cytotoxicity risks since, as anticancer  
309 agent, it invokes DNA biosynthesis as a pathway. Thus, it is important to identify the  
310 mechanism-of-action of these compounds with respect to the liver stage of the parasite. For  
311 instance, the dual-active MMV1578884 (REP3123) is a *Clostridium difficile* methionyl-tRNA

312 synthetase (metRS) inhibitor and could target aminoacyl-tRNA synthetases (aaRS) in *P.*  
313 *falciparum*. To our knowledge there is no aaRS inhibitor in clinical development as antimalarial  
314 but structural differences between several PfaaRS and their human counterparts are  
315 encouraging that selectivity can be achieved.<sup>38</sup> Notably, MMV1578574 (eravacycline), as a  
316 tetracycline-class antibacterial recently approved for the treatment of complicated intra-  
317 abdominal bacterial infections, binds to the 30S ribosomal subunit similar doxycycline, the  
318 latter used prophylactically for malaria and demonstrating liver stage activity clinically.<sup>34</sup>  
319 Eravacycline was only identified with asexual stage activity in our screens and not liver stage  
320 activity.

321 The involvement of protein and lipid kinases in key pathogen functions have made  
322 inhibitors thereof a focus of drug design strategies including those that affect multiple life cycle  
323 stages.<sup>39</sup> Amongst the asexual stage active compounds identified, MMV1580482 (URMC-099)  
324 operates as a human MLK3 inhibitor and MMV1593539 as a *Staphylococcus aureus* pyruvate  
325 kinase inhibitor. However, due to MMV1580482's activity against breast cancer cell lines and  
326 brain metastatic variants while notably having a brain-penetrant capability, achieving  
327 *Plasmodium* selectivity in an analogue program directed against malaria will be challenging.  
328 In addition to selectivity over human homologues, MMV1593539 also contains a nitro group  
329 that is considered a red flag, and safety needs to be assessed or attempts made to replace  
330 this group. Interestingly, of the two reported pyruvate kinases in *P. falciparum* (PK1 and PK2),  
331 PK1 has a crystal structure ([10.2210/pdb3KHD/pdb](https://doi.org/10.2210/pdb3KHD/pdb)), which could guide selectivity and  
332 optimization studies provided P~~F~~PK1 is responsible for phenotypic activity.

333 Importantly, our parallel screening approach on different life cycle stages yielded  
334 compounds and chemical scaffolds that not only have stage-specific asexual parasite activity  
335 but also selectively and specifically target the elusive gametocyte stages with activity in  
336 mosquito transmission assays. This unbiased approach, where compounds are not only  
337 profiled for additional life cycle activity once asexual activity has been established, confirms  
338 the possibility of identifying gametocyte-specific compounds.<sup>7, 9, 11</sup> Indeed, we identified  
339 several active compounds that have no previous documentation of antimalarial activity, simply  
340 because they were not screened against the correct life cycle form of the parasite where the  
341 relevant biology being targeted was essential.

342 Our stringent profiling cascade additionally ensured a high success rate in confirming  
343 transmission-blocking activity and validates the use of orthogonal gametocytocidal screens<sup>4,</sup>  
344 <sup>11</sup> as a primary filter in large scale screens. In addition, this approach resulted in a linear  
345 correlation between gametocytocidal activity and activity against male gametes, which directly  
346 translated to oocyst reduction. By evaluating both TRA and TBA, our data highlighted the  
347 importance of both parameters in evaluating SMFA data. Importantly, we showed a large  
348 reduction in TRA for some compounds. This indicates that the decreased number of oocysts

349 carried by such mosquitoes will result in a lowered efficacy of transmission, as intensity of a  
350 mosquito infection has been shown to be critically important to the success of transmission.<sup>40</sup>  
351 However, we additionally observe a decrease in oocyst prevalence (TBA), that implies that  
352 the majority of mosquitoes treated with compounds that affect oocyst prevalence would not  
353 carry parasites. The latter will also therefore have an epidemiological impact in line with WHO-  
354 recommended vector control interventions, where an efficacy of >80% would result in a major  
355 impact on transmission. Interestingly, three of the most active transmission-blocking  
356 compounds with epidemiological impact also somewhat affect the mosquito vector  
357 themselves. These compounds could indeed provide a conceptual innovation, as they would  
358 fit both TCP-5 and -6 criteria and therefore block transmission as well as shorten the lifespan  
359 of the mosquito,<sup>41</sup> particularly if their potency against the mosquito could be improved.

360 Gametocyte-targeted compounds have become important to deliver leads for  
361 development as transmission-blocking specific antimalarials, filling the niche required for TCP-  
362 5.<sup>36</sup> Compounds with selective transmission-blocking activity would presumably target  
363 divergent biological processes compared to those in asexual parasites<sup>42</sup> and this, in addition  
364 to the low parasite numbers in transmission stages and non-proliferative nature of  
365 gametocytes, would reduce the risk of resistance development. When used in combination  
366 with a TCP-1 candidate, such TCP-5 targeted compounds could also protect the TCP-1 drug  
367 from resistance development. Alternatively, when used as a stand-alone drug, TCP-5 targeted  
368 compounds would decrease the gametocyte burden in the human population, which would be  
369 particularly important in pre-elimination settings as add-ons to enhance standard measures of  
370 malaria control.

371 Our data also indicate specific gametocyte-associated biological processes worthy of  
372 further investigation. Though the PRB contained nine azole antifungals (including miconazole,  
373 ketoconazole, fluconazole), only two imidazoles (eberconazole, MMV1634492, and  
374 MMV1634491) showed activity against gametocytes, the latter with >10-fold selectivity relative  
375 to the asexual stage. This is the first report of the antimalarial activity of eberconazole, though  
376 this has been seen for other azole antifungals. Ketoconazole, miconazole and clotrimazole,  
377 like eberconazole, inhibit fungal ergosterol biosynthesis,<sup>24</sup> but they are also known to target  
378 the heme detoxification system in asexual *P. falciparum*.<sup>43</sup> Although heme catabolism is  
379 essentially absent in mature gametocytes,<sup>5</sup> some heme metabolic activity seems to be present  
380 in *P. berghei* mosquito stages<sup>44</sup> and this process as a target for these compounds cannot be  
381 excluded. Moreover, as these compounds have exclusive transmission-blocking activity, a  
382 novel mode of action might be indicated.

383 In addition to the azoles, we identified ML324 with exclusive activity against  
384 gametocytes. This JmjC demethylase inhibitor was recently shown to be more active against  
385 immature gametocytes (~1 µM) than asexual parasites.<sup>45</sup> Our data showed for the first time

386 that ML324 has increased potency as gametocytes mature to stage IV/V (0.077  $\mu$ M) and  
387 potently kills male gametes with confirmed transmission-blocking activity. This implies that  
388 mature gametocytes and male gametes are even more sensitive to changes in histone  
389 methylation status due to ML324 treatment, which results in deregulated gene expression,  
390 similar to what is seen for other JmjC demethylase inhibitors.<sup>45</sup>

391 Lastly, the selective transmission-blocking actives included two compounds that are  
392 established inhibitors of MmpL3 in bacteria.<sup>19, 20, 21</sup> Albeit structurally dissimilar, both  
393 compounds inhibit MmpL3 through interaction with the protein pore section as indicated by  
394 co-crystallization data.<sup>46</sup> A homologue for this protein is not detectable in the *Plasmodium*  
395 genome but the potent (0.107  $\mu$ M) and selective mechanism-of-action on the non-proliferative  
396 differentiated *P. falciparum* gametocytes may be similar to that observed in *Trypanosoma*  
397 *cruzi*, where activity was seen against the non-proliferative and transmissible trypomastigotes  
398 (0.05  $\mu$ M). With the absence of MmpL3 homologues in *T. cruzi*, the activity was explained to  
399 be due to the disruption of the proton gradient across the parasite's mitochondrial  
400 membrane.<sup>23</sup> The possibility of a similar action against *P. falciparum* gametocytes is currently  
401 being investigated, in light of the known increased reliance on mitochondrial metabolism  
402 compared to asexual *P. falciparum* parasites.<sup>42, 47</sup> However, the possibility also exists that  
403 these compounds interfere with lipid metabolism/transport, which is essential to  
404 gametocytogenesis<sup>48</sup> and oocyst development.<sup>49</sup> SQ109 and another GPCR inhibitor  
405 (MMV1581558) also have the potential to block *P. falciparum* transmission whilst  
406 simultaneously affecting the mosquito vector.

407 An open challenge remains the determination of the mechanism-of-action of  
408 transmission-blocking targeted compounds. Since established forward genetic mutant  
409 generation routes to identify drug targets are not applicable to the non-proliferating  
410 gametocytes, alternative proteomic techniques such as thermal shift, protease protection  
411 assays, chemical pull-downs or other technologies available through consortia like MaIDA  
412 (Malaria Drug Accelerator) will be critical to progress these compounds from discovery to  
413 development. One advantage of screening boxes such as the PRB that contain a large number  
414 of compounds with already well described DMPK profiles and empirically determined physical  
415 characteristics, is that they could progress rapidly through the drug discovery pipeline.

416

## 417 **METHODS**

### 418 **Ethics statement**

419 This work holds ethical approval from the University of Pretoria Health Sciences Ethics  
420 Committee (506/2018); University of Cape Town: AEC017/026; University of the  
421 Witwatersrand Human Research Ethics Committee (M130569) and Animal Ethics Committee

422 (20190701-70); CSIR Research Ethics Committee (Ref 10/2011) and Scripps Research's  
423 Normal Blood Donor Service (NBDS), with approval under IRB Number 125933.

#### 424 **Parasite culturing**

425 *P. falciparum* asexual parasite cultures, drug sensitive strain NF54 (*PfNF54*), drug resistant  
426 strain Dd2 (*PfDd2*, chloroquine, pyrimethamine and mefloquine resistant) and the luciferase  
427 reporter line NF54-*Pfs16*-GFP-Luc (kind gift from David Fidock, Columbia University, USA)<sup>50</sup>  
428 were maintained at 37°C in human erythrocytes (5% hematocrit) in complete culture medium  
429 RPMI 1640 medium [25 mM HEPES, 0.2% (w/v) D-glucose, ~200 µM hypoxanthine, 0.2%  
430 (w/v) sodium bicarbonate, 24 µg/mL gentamicin and 0.5% (w/v) AlbuMAX II lipid-rich BSA or  
431 4.3% (v/v) heat inactivated O<sup>+</sup> human serum] under hypoxic conditions as previously  
432 described.<sup>4</sup> Gametocytogenesis was induced from asexual parasites (0.5% parasitemia, 6%  
433 hematocrit) NF54-background parasites as described.<sup>4</sup> After a drop in hematocrit (to 4%) after  
434 three days, gametocytogenesis was monitored microscopically with daily medium changes.  
435 On days 5-10, residual asexual parasites were eliminated with 50 mM N-acetyl glucosamine  
436 (NAG) treatment in complete culture medium.

#### 437 **Asexual blood stage screening**

438 *PfNF54* asexual parasite activity was determined with the parasite lactate  
439 dehydrogenase assay (pLDH) as described.<sup>51,52</sup> All compounds were screened (2 µM and 20  
440 µM) in two replicates on ring-stage cultures (1% hematocrit, 2% parasitemia) for 72 h under  
441 hypoxic conditions at 37°C, and survival determined colorimetrically at 620 nm. The IC<sub>50</sub> (half-  
442 maximal concentration) was determined for active compounds under the same conditions.  
443 Chloroquine and artesunate were used as controls.

444 *PfDd2* asexual parasites activity was determined with SYBR Green I as described<sup>13</sup>  
445 on parasite suspensions (0.3% parasitemia, 2.5% hematocrit) in black, clear bottom plates  
446 with pre-spotted compounds and incubated at 37°C for 72 h under hypoxic conditions. 2 µL  
447 10x SYBR Green I (Invitrogen) in Lysis buffer (20mM Tris/HCl, 5mM EDTA, 0.16% (w/v)  
448 Saponin, 1.6% (v/v) Triton X) was added and plates incubated in the dark at room temperature  
449 (RT) for 24 h. Fluorescence was measured using the EnVision<sup>®</sup> Multilabel Reader  
450 (PerkinElmer) (485 nm excitation, 530 nm emission). IC<sub>50</sub> values were determined in CDD  
451 Vault (<https://www.collaborativedrug.com/>) normalized to maximum and minimum inhibition  
452 levels for the positive (Artemisinin) and negative (DMSO) control wells.

#### 453 **Gametocyte screening<sup>4</sup>**

454 *PrestoBlue<sup>®</sup> fluorescence assay*: Stage IV/IV gametocyte cultures (2% gametocytemia,  
455 5% hematocrit, 100 µL/well) were exposed to compounds and incubated at 37°C for 48 h  
456 under hypoxic conditions, stationary, after which 10 µL of PrestoBlue<sup>®</sup> reagent was added to  
457 each well and incubated at 37°C for 2 h. Fluorescence was detected in the supernatant (70

458  $\mu\text{L}$ , 535 nm excitation, 612 nm emission) with a Tecan Infinite F500 Multimode reader.  
459 Dihydroartemisinin (DHA) was used as positive kill control.

460 *ATP bioluminescence assay:* Stage IV/IV gametocyte cultures were enriched with  
461 density gradients as described<sup>4</sup> and 75 000 gametocytes were seeded into 96-well plates in  
462 the presence of compound and incubated for 24 h at 37°C. ATP levels were determined as  
463 described with a Promega BacTiter-Glo™ Bioluminescence system.<sup>4</sup> Methylene blue (MB)  
464 was used as positive kill control.

465 *Luciferase reporter assay:* Stage IV/IV gametocytes (2% gametocytemia, 2%  
466 hematocrit) from the NF54-*pfs16*-GFP-Luc line<sup>50</sup> were seeded with compounds and incubated  
467 for 48 h under hypoxic conditions at 37°C. Luciferase activity was determined in 30  $\mu\text{L}$  parasite  
468 lysates by adding 30  $\mu\text{L}$  luciferin substrate (Promega Luciferase Assay System)  
469 bioluminescence detected with a 10 s integration constant (GloMax®-Multi+ Detection  
470 System).<sup>4</sup> MB and MMV390048<sup>53</sup> were used as positive controls and IC<sub>50</sub> determined with  
471 non-linear curve fitting (GraphPad Prism 6) normalized to maximum and minimum inhibition  
472 (DMSO control wells).

#### 473 **Male gamete exflagellation inhibition assay (EIA)**<sup>54</sup>

474 Gametogenesis was induced on >98% stage V gametocyte cultures by treating with 100  $\mu\text{M}$   
475 xanthurenic acid (XA) in ookinete medium (RPMI 1640 with 25 mM HEPES, 0.2% sodium  
476 bicarbonate, pH 8.0, and 20% human serum, A+ male) followed by a >15 min incubation at  
477 RT. The EIA was performed as described<sup>54</sup> on >95% stage V gametocytes, resuspended in  
478 30  $\mu\text{L}$  ookinete medium (culture medium with 100  $\mu\text{M}$  XA, 20% human serum, A+ male).  
479 Exflagellating centers were recorded by video microscopy (Carl Zeiss NT 6V/10W Stab  
480 microscope with a MicroCapture camera, 10X magnification) in 10  $\mu\text{L}$  activated culture settled  
481 in a Neubauer chamber at RT. Centers were semi-automatically quantified from 15 randomly  
482 located videos of 8-10 s each after 15-22.5 min.

#### 483 ***P. berghei* liver stage assay**

484 Potential causal prophylactic activity was tested as previously described<sup>13</sup> on HepG2-A16-  
485 CD81 cells exposed to compounds and incubated for 24 h. Thereafter, fresh *P.*  
486 *berghei* sporozoites (*P. berghei* ANKA GFP-Luc-SMcon) from infected *An. stephensi*  
487 mosquitoes' salivary gland dissections were added (1 x 10<sup>3</sup>/well), centrifuged (5 min, 330g)  
488 and incubated at 37°C for 48 h. 2  $\mu\text{L}$  of luciferin reagent (Promega BrightGlo) was added and  
489 luciferase activity detected (Perkin Elmer Envision). IC<sub>50</sub> values were determined in CDD Vault  
490 as above (GNF179 as positive, DMSO as negative controls).

#### 491 **Cytotoxicity counter-screening**

492 Cytotoxicity against Chinese hamster ovarian (CHO) cells was colorimetrically determined  
493 using 3-(4,5-dimethyl-thiazol-2-yl)-2,5-diphenyltetrazo-lium bromide (MTT).<sup>55</sup> Cells were  
494 seeded at a density of 106 cells/well in 200  $\mu\text{L}$  medium, incubated 24 h and medium replaced

495 with 200  $\mu$ L of fresh medium containing the compounds (2 or 20  $\mu$ M) and incubated for 48 h.  
496 Emetine was used as the control. Cytotoxicity against a Hepatocellular carcinoma line  
497 (HepG2-A16-CD81) was performed by adding Promega CellTiter-Glo<sup>®</sup> (2  $\mu$ L) to these cells  
498 seeded as above for the sporozoite liver stage assay but in the absence of sporozoites, and  
499 luminescence measured. Curve fitting was done as above using puromycin (positive control)  
500 and DMSO (negative control).

#### 501 **Mosquito rearing and standard membrane feeding assay (SMFA)**

502 *Anopheles coluzzii* mosquitoes (G3 colony, species confirmed in<sup>56, 57</sup>) were reared at 80%  
503 humidity, 25°C, 12 h day/night cycle with 45 min dusk/dawn transitions<sup>58</sup> on a 10% sucrose  
504 solution diet supplemented with 0.05% 4-aminobenzoic acid. A mature stage V gametocyte  
505 (NF54-strain, 1.5-2.5% gametocytemia, 50% hematocrit, A+ male serum with fresh  
506 erythrocytes) was evaluated for male gamete exflagellation and male:female ratio of 1:3  
507 confirmed before proceeding with feeding. Gametocytes were treated with 2  $\mu$ M of each  
508 compound for 48 h. Glass feeders covered with cow intestine with 1 mL of the gametocyte  
509 culture, on top of feeding cups (350 mL), were used for SMFA. Each cup contained 25 unfed  
510 (2-3 h starvation) *An. coluzzii* females (5-7 days old), fed in the dark for 40 min at RT. After  
511 removing unfed/partially fed mosquitoes, females were housed as above for 8-10 days and  
512 then dissected to remove midguts, which were rinsed in PBS, incubated in 0.1% (v/v)  
513 mercurochrome for 8-10 min and oocysts counted under bright field illumination (20-40x  
514 magnification). Reduction in prevalence (transmission-blocking activity, %TBA:  $\frac{Cp-Tp}{Cp} * 100$ ,  
515 where  $p$ : oocyst prevalence,  $C$ : control and  $T$ : treated) and reduction in number of oocysts  
516 intensity (transmission-reducing activity, %TRA:  $\frac{Ci-Ti}{Ci} * 100$ , where  $i$ : oocyst number  
517 (intensity),  $C$ : control and  $T$ : treated)<sup>59</sup> was determined. Each experiment included 2 technical  
518 repeats (2 feeding cups per compound) and this was repeated for at least three independent  
519 biological experiments per compound. Non-parametric  $t$ -test (Mann-Whitney) was applied  
520 (Graphpad Prism 8.3.0) for statistical analysis.

#### 521 **Endectocide evaluation**

522 Endectocidal activity was determined using SMFA as above but with 2  $\mu$ M of each compound  
523 in cow blood (100  $\mu$ L) at 37°C for 35 min feeds. Each 350 mL feeding cup contained 30 *An.*  
524 *coluzzii* females (4 h starved, 2-5 days old). Fully or partially fed females were retained for  
525 daily monitoring of mortality under standard insectary rearing conditions, for up to 4 days post-  
526 treatment. Ivermectin and DMSO were used as positive and negative controls, respectively.  
527 Between 3-5 independent replicates were performed per compound. Mean 4-day mortality  
528 was statistically evaluated with ANOVA against the negative DMSO control (Graphpad Prism  
529 8.3.0).

#### 530 **Data analysis and chemical clustering**



531 Drug classes and biological pathways or protein targets were identified for each compound  
532 after text and structure searches of PubChem (<https://pubchem.ncbi.nlm.nih.gov/>), DrugBank  
533 (<https://www.drugbank.ca/>) and SciFinder (<https://sso.cas.org>). Chemical space analysis was  
534 performed with StarDrop v 6.6 (<https://www.optibrium.com/stardrop/>) based on structure  
535 similarities. The launched drug space was generated from the data file available with Stardrop  
536 software. The antimalarial drug space was generated using marketed antimalarial drugs and  
537 compounds undergoing clinical trials. The connectivity network was constructed by clustering  
538 the compounds using the *FragFP* descriptor (Tanimoto similarity index >0.50) in OSIRIS  
539 DataWarrior v 5.0.0 ([www.openmolecules.org](http://www.openmolecules.org)). The network was visualized using Cytoscape  
540 v 3.7.2. Supra-hexagonal maps was generated in Rstudio with the RColorBrewer R  
541 package.<sup>60, 61</sup>

542 **Code availability.**

543 All computer codes used to analyze the data are available from the corresponding author upon  
544 request

545 **Data availability**

546 The data presented in this study area available from the corresponding author upon request.

547

548

549 **References:**

- 550 1. Sinden RE. A biologist's perspective on malaria vaccine development. *Hum Vaccin* **6**, 3-11  
551 (2010).  
552
- 553 2. Josling GA, Llinas M. Sexual development in *Plasmodium* parasites: knowing when it's time  
554 to commit. *Nat Rev Microbiol* **13**, 573-587 (2015).  
555
- 556 3. Sinden RE. The cell biology of malaria infection of mosquito: advances and opportunities. *Cell*  
557 *Microbiol* **17**, 451-466 (2015).  
558
- 559 4. Reader J, *et al.* Nowhere to hide: interrogating different metabolic parameters of *Plasmodium*  
560 *falciparum* gametocytes in a transmission blocking drug discovery pipeline towards malaria  
561 elimination. *Malar J* **14**, 213 (2015).  
562
- 563 5. Plouffe DM, *et al.* High-Throughput Assay and Discovery of Small Molecules that Interrupt  
564 Malaria Transmission. *Cell Host Microbe* **19**, 114-126 (2016).  
565
- 566 6. Delves M, *et al.* The activities of current antimalarial drugs on the life cycle stages of  
567 *Plasmodium*: a comparative study with human and rodent parasites. *PLoS Med* **9**, e1001169  
568 (2012).  
569
- 570 7. Abraham M, *et al.* Probing the Open Global Health Chemical Diversity Library for multistage-  
571 active starting points for next-generation antimalarials. *ACS Infect Dis*, (2020).  
572
- 573 8. Delves MJ. *Plasmodium* cell biology should inform strategies used in the development of  
574 antimalarial transmission-blocking drugs. *Future Med Chem* **4**, 2251-2263 (2012).  
575
- 576 9. Delves M, *et al.* Fueling Open Innovation for Malaria Transmission-Blocking Drugs: Hundreds  
577 of Molecules Targeting Early Parasite Mosquito Stages. *Front Microbiol* **10**, 2134 (2019).  
578
- 579 10. Miguel-Blanco C, *et al.* Hundreds of dual-stage antimalarial molecules discovered by a  
580 functional gametocyte screen. *Nat Commun* **8**, 15160 (2017).  
581
- 582 11. Delves MJ, *et al.* A high throughput screen for next-generation leads targeting malaria  
583 parasite transmission. *Nat Commun* **9**, 3805 (2018).  
584
- 585 12. Swann J, *et al.* High-Throughput Luciferase-Based Assay for the Discovery of Therapeutics  
586 That Prevent Malaria. *ACS Infect Dis* **2**, 281-293 (2016).  
587
- 588 13. Antonova-Koch Y, *et al.* Open-source discovery of chemical leads for next-generation  
589 chemoprotective antimalarials. *Science* **362**, (2018).  
590
- 591 14. Benetatos CA, *et al.* Birinapant (TL32711), a bivalent SMAC mimetic, targets TRAF2-  
592 associated cIAPs, abrogates TNF-induced NF-kappaB activation, and is active in patient-  
593 derived xenograft models. *Mol Cancer Ther* **13**, 867-879 (2014).  
594
- 595 15. Fernandez-Villa D, Aguilar MR, Rojo L. Folic Acid Antagonists: Antimicrobial and  
596 Immunomodulating Mechanisms and Applications. *Int J Mol Sci* **20**, (2019).  
597
- 598 16. Frey KM, Viswanathan K, Wright DL, Anderson AC. Prospective screening of novel  
599 antibacterial inhibitors of dihydrofolate reductase for mutational resistance. *Antimicrob Agents*  
600 *Chemother* **56**, 3556-3562 (2012).  
601
- 602 17. Lamb KM, N GD, Wright DL, Anderson AC. Elucidating features that drive the design of  
603 selective antifolates using crystal structures of human dihydrofolate reductase. *Biochemistry*  
604 **52**, 7318-7326 (2013).  
605
- 606 18. Kirkpatrick JE, Kirkwood KL, Woster PM. Inhibition of the histone demethylase KDM4B leads  
607 to activation of KDM1A, attenuates bacterial-induced pro-inflammatory cytokine release, and  
608 reduces osteoclastogenesis. *Epigenetics* **13**, 557-572 (2018).

- 609  
610 19. Tahlan K, *et al.* SQ109 targets MmpL3, a membrane transporter of trehalose monomycolate  
611 involved in mycolic acid donation to the cell wall core of *Mycobacterium tuberculosis*.  
612 *Antimicrob Agents Chemother* **56**, 1797-1809 (2012).  
613  
614 20. Sacksteder KA, Protopopova M, Barry CE, 3rd, Andries K, Nacy CA. Discovery and  
615 development of SQ109: a new antitubercular drug with a novel mechanism of action. *Future*  
616 *Microbiol* **7**, 823-837 (2012).  
617  
618 21. Li K, *et al.* Multitarget drug discovery for tuberculosis and other infectious diseases. *J Med*  
619 *Chem* **57**, 3126-3139 (2014).  
620  
621 22. Ramesh R, *et al.* Repurposing of a drug scaffold: Identification of novel sila analogues of  
622 rimonabant as potent antitubercular agents. *Eur J Med Chem* **122**, 723-730 (2016).  
623  
624 23. Veiga-Santos P, *et al.* SQ109, a new drug lead for Chagas disease. *Antimicrob Agents*  
625 *Chemother* **59**, 1950-1961 (2015).  
626  
627 24. Torres-Rodriguez JM, *et al.* In vitro susceptibilities of clinical yeast isolates to the new  
628 antifungal eberconazole compared with their susceptibilities to clotrimazole and ketoconazole.  
629 *Antimicrob Agents Chemother* **43**, 1258-1259 (1999).  
630  
631 25. Zampieri D, Mamolo MG, Laurini E, Scialino G, Banfi E, Vio L. Antifungal and  
632 antimycobacterial activity of 1-(3,5-diaryl-4,5-dihydro-1H-pyrazol-4-yl)-1H-imidazole  
633 derivatives. *Bioorg Med Chem* **16**, 4516-4522 (2008).  
634  
635 26. Delves MJ, *et al.* Male and female *Plasmodium falciparum* mature gametocytes show  
636 different responses to antimalarial drugs. *Antimicrob Agents Chemother* **57**, 3268-3274  
637 (2013).  
638  
639 27. Ruecker A, *et al.* A male and female gametocyte functional viability assay to identify  
640 biologically relevant malaria transmission-blocking drugs. *Antimicrob Agents Chemother* **58**,  
641 7292-7302 (2014).  
642  
643 28. Li T, *et al.* Robust, reproducible, industrialized, standard membrane feeding assay for  
644 assessing the transmission blocking activity of vaccines and drugs against *Plasmodium*  
645 *falciparum*. *Malar J* **14**, 150 (2015).  
646  
647 29. Dechering KJ, *et al.* Modelling mosquito infection at natural parasite densities identifies drugs  
648 targeting EF2, PI4K or ATP4 as key candidates for interrupting malaria transmission. *Sci Rep*  
649 **7**, 17680 (2017).  
650  
651 30. Colmenarejo G, *et al.* Predicting transmission blocking potential of anti-malarial compounds in  
652 the Mosquito Feeding Assay using *Plasmodium falciparum* Male Gamete Inhibition Assay. *Sci*  
653 *Rep* **8**, 7764 (2018).  
654  
655 31. Vos MW, *et al.* A semi-automated luminescence based standard membrane feeding assay  
656 identifies novel small molecules that inhibit transmission of malaria parasites by mosquitoes.  
657 *Sci Rep* **5**, 18704 (2015).  
658  
659 32. Hooft van Huijsduijnen R, *et al.* Anticancer properties of distinct antimalarial drug classes.  
660 *PLoS One* **8**, e82962 (2013).  
661  
662 33. Nzila A, Okombo J, Becker RP, Chilengi R, Lang T, Nihues T. Anticancer agents against  
663 malaria: time to revisit? *Trends Parasitol* **26**, 125-129 (2010).  
664  
665 34. Gaillard T, Madamet M, Tsombeng FF, Dormoi J, Pradines B. Antibiotics in malaria therapy:  
666 which antibiotics except tetracyclines and macrolides may be used against malaria? *Malar J*  
667 **15**, 556 (2016).  
668

- 669 35. Pongratz P, Kurth F, Ngoma GM, Basra A, Ramharter M. In vitro activity of antifungal drugs  
670 against *Plasmodium falciparum* field isolates. *Wien Klin Wochenschr* **123 Suppl 1**, 26-30  
671 (2011).  
672
- 673 36. Burrows JN, *et al.* New developments in anti-malarial target candidate and product profiles.  
674 *Malar J* **16**, 26 (2017).  
675
- 676 37. Ebert G, *et al.* Targeting the Extrinsic Pathway of Hepatocyte Apoptosis Promotes Clearance  
677 of *Plasmodium* Liver Infection. *Cell Rep* **30**, 4343-4354 e4344 (2020).  
678
- 679 38. Manickam Y, Chaturvedi R, Babbar P, Malhotra N, Jain V, Sharma A. Drug targeting of one  
680 or more aminoacyl-tRNA synthetase in the malaria parasite *Plasmodium falciparum*. *Drug*  
681 *Discov Today* **23**, 1233-1240 (2018).  
682
- 683 39. Cabrera DG, Horatscheck A, Wilson CR, Basarab G, Eyermann CJ, Chibale K. Plasmodial  
684 Kinase Inhibitors: License to Cure? *J Med Chem* **61**, 8061-8077 (2018).  
685
- 686 40. Churcher TS, *et al.* Probability of Transmission of Malaria from Mosquito to Human Is  
687 Regulated by Mosquito Parasite Density in Naive and Vaccinated Hosts. *PLoS Pathog* **13**,  
688 e1006108 (2017).  
689
- 690 41. Burrows J, *et al.* A discovery and development roadmap for new endectocidal transmission-  
691 blocking agents in malaria. *Malar J* **17**, 462 (2018).  
692
- 693 42. van Biljon R, *et al.* Hierarchical transcriptional control regulates *Plasmodium falciparum*  
694 sexual differentiation. *BMC Genomics* **20**, 920 (2019).  
695
- 696 43. Huy NT, *et al.* Effect of antifungal azoles on the heme detoxification system of malarial  
697 parasite. *J Biochem* **131**, 437-444 (2002).  
698
- 699 44. Nagaraj VA, *et al.* Malaria parasite-synthesized heme is essential in the mosquito and liver  
700 stages and complements host heme in the blood stages of infection. *PLoS Pathog* **9**,  
701 e1003522 (2013).  
702
- 703 45. Matthews KA, *et al.* Disruption of the *Plasmodium falciparum* life cycle through transcriptional  
704 reprogramming by inhibitors of Jumonji demethylases. *ACS Infect Dis*, (2020).  
705
- 706 46. Zhang B, *et al.* Crystal Structures of Membrane Transporter MmpL3, an Anti-TB Drug Target.  
707 *Cell* **176**, 636-648 e613 (2019).  
708
- 709 47. MacRae JI, *et al.* Mitochondrial metabolism of sexual and asexual blood stages of the malaria  
710 parasite *Plasmodium falciparum*. *BMC Biol* **11**, 67 (2013).  
711
- 712 48. Gulati S, *et al.* Profiling the Essential Nature of Lipid Metabolism in Asexual Blood and  
713 Gametocyte Stages of *Plasmodium falciparum*. *Cell Host Microbe* **18**, 371-381 (2015).  
714
- 715 49. G. Costa MG, M. Eldering, R.L. Lindquist, A.E. Hauser, R. Sauerwein, C. Goosmann, V.  
716 Brinkmann, View ORCID ProfileE.A. Levashina. Non-competitive resource exploitation  
717 within-mosquito shapes evolution of malaria virulence.  
718
- 719 50. Adjalley SH, Johnston GL, Li T, Eastman RT, Ekland EH. Quantitative assessment of  
720 *Plasmodium falciparum* sexual development reveals potent transmission-blocking activity by  
721 methylene blue. *Proceedings of the National Academy of Sciences of the United States of*  
722 *America* **108**, 1214 - 1223 (2011).  
723
- 724 51. Wu CP, van Schalkwyk DA, Taylor D, Smith PJ, Chibale K. Reversal of chloroquine  
725 resistance in *Plasmodium falciparum* by 9H-xanthene derivatives. *Int J Antimicrob Agents* **26**,  
726 170-175 (2005).  
727

- 728 52. Makler MT, *et al.* Parasite lactate dehydrogenase as an assay for *Plasmodium falciparum*  
729 drug sensitivity. *Am J Trop Med Hyg* **48**, 739-741 (1993).  
730
- 731 53. Paquet T, *et al.* Antimalarial efficacy of MMV390048, an inhibitor of *Plasmodium*  
732 phosphatidylinositol 4-kinase. *Sci Transl Med* **9**, (2017).  
733
- 734 54. Coetzee N, von Gruning H, Opperman D, van der Watt M, Reader J, Birkholtz LM. Epigenetic  
735 inhibitors target multiple stages of *Plasmodium falciparum* parasites. *Sci Rep* **10**, 2355  
736 (2020).  
737
- 738 55. Rubinstein LV, *et al.* Comparison of in vitro anticancer-drug-screening data generated with a  
739 tetrazolium assay versus a protein assay against a diverse panel of human tumor cell lines. *J*  
740 *Natl Cancer Inst* **82**, 1113-1118 (1990).  
741
- 742 56. Coetzee M, Hunt RH, Wilkerson R, Della Torre A, Coulibaly MB, Besansky NJ. *Anopheles*  
743 *coluzzii* and *Anopheles amharicus*, new members of the *Anopheles gambiae* complex.  
744 *Zootaxa* **3619**, 246-274 (2013).  
745
- 746 57. Fanello C, Santolamazza F, della Torre A. Simultaneous identification of species and  
747 molecular forms of the *Anopheles gambiae* complex by PCR-RFLP. *Med Vet Entomol* **16**,  
748 461-464 (2002).  
749
- 750 58. Hunt RH, Brooke BD, Pillay C, Koekemoer LL, Coetzee M. Laboratory selection for and  
751 characteristics of pyrethroid resistance in the malaria vector *Anopheles funestus*. *Med Vet*  
752 *Entomol* **19**, 271-275 (2005).  
753
- 754 59. Miura K, *et al.* Transmission-blocking activity is determined by transmission-reducing activity  
755 and number of control oocysts in *Plasmodium falciparum* standard membrane-feeding assay.  
756 *Vaccine* **34**, 4145-4151 (2016).  
757
- 758 60. Nychka D, Furrer R, Paige J, Sain S. fields: Tools for spatial data. (2017).  
759
- 760 61. Neuwirth E. RColorBrewer: ColorBrewer Palettes. (2014).  
761  
762  
763

764 **Acknowledgements**

765 We thank the MMV for assembly and supply of the PRB and Didier Leroy and Esperanza  
766 Herreros from the MMV for helpful discussions. We thank Dr A. Bennett for prior optimization  
767 of the SMFA.

768 We thank the Medicines for Malaria Venture and South African Technology Innovation Agency  
769 (TIA) for funding (Project MMV18/0001). This project was in part supported by the South  
770 African Medical Research Council with funds received from the South African Department of  
771 Science and Innovation, in partnership with the Medicines for Malaria Venture (KC, LMB, LLK  
772 and TLC); and the DST/NRF South African Research Chairs Initiative Grant (LMB UID 84627,  
773 LLK UID: 171215294399; KC UID: 64767); and CSIR Parliamentary Grant funding (AT, DM).  
774 EAW thanks the Bill and Melinda Gates Foundation for funding (Grant OPP1054480).

775

776 **Author contributions**

777 JD, LMB, KC, LLK, GB, EAW and TLC conceptualized the work and supervised the data  
778 acquisition. MvdW, JR, DT, NM, SO, AT, PM, SL, BB, EE, NV and LN performed experiments  
779 and data analysis. CLM, AvH, AH, GB, DC, LLK and LMB performed additional data analysis.  
780 LMB, MvW and JR wrote the manuscript with contributions from all authors.

781

782 **Competing interests**

783 None to declare

784

785 **Additional Information**

786 Supplementary data files (File S1, S2 and S3) as well as supplementary figures (Fig S1, Fig  
787 S2, S3 and Fig S4) are included.

788

## 789 **Figure Legends**

790

791 **Figure 1: Screening cascade of the MMV Pandemic Response Box for activity against**  
792 **multiple life cycle stages of *Plasmodium*.** The 400 compounds in the PRB were screened  
793 in a primary assay against drug sensitive (NF54) *P. falciparum* asexual blood stages (ABS, at  
794 2 and 20  $\mu\text{M}$ ) and mature gametocytes (stage IV/IV, GC, 1 and 5  $\mu\text{M}$ ) and *P. berghei* liver  
795 stages (5  $\mu\text{M}$ ). Hits were selected based on  $\geq 50\%$  inhibition at specific concentrations as  
796 indicated. The criteria for each decision point are indicated followed by the number of  
797 compounds that passed the criteria. Compounds were additionally evaluated in dose-  
798 response on drug resistant asexual Dd2 parasites (chloroquine, pyrimethamine and  
799 mefloquine resistant). IC<sub>50</sub>: 50% inhibitory concentration, pLDH: parasite lactate  
800 dehydrogenase assay, PB: PrestoBlue<sup>®</sup> assay, ATP: ATP viability assay, Luc: luciferase  
801 reporter lines assays. *Pf*: *Plasmodium falciparum*. *Pb*: *Plasmodium berghei*, S.I.: selectivity  
802 index; CHO: Chinese hamster ovarian cells; HepG2: hepatocellular carcinoma line; TBA:  
803 transmission-blocking activity; TRA: transmission-reducing activity; SMFA: standard  
804 membrane feeding assay.

805

806 **Figure 2: Primary screening of the MMV PRB for hits against *P. falciparum* parasites.**

807 **(A)** Supra-hexagonal maps of all 400 compounds included in the MMV PRB after analysis on  
808 *P. falciparum* NF54 asexual blood stage parasites and stage IV/IV gametocytes. Each  
809 hexagon is indicative of a single compound and the order of the hexagon is the same between  
810 the two plots. Colors on the heat bar indicate % inhibition of proliferation (asexual blood stage  
811 parasites) or viability (stage IV/IV gametocytes) after treatment with each compound at either  
812 2  $\mu\text{M}$  (asexual blood stages) or 5  $\mu\text{M}$  (stage IV/IV gametocytes or liver stages), screened at  
813 least in duplicate. The data for the stage IV/IV gametocytes are compiled from hits identified  
814 with three different assay platforms, run in parallel (ATP, PrestoBlue<sup>®</sup> and luciferase reporter  
815 expression) with any hit on any platform included, and where identified on >2 platforms, the  
816 highest value was included. **(B)** Proportional distribution of hits (>50% inhibition @ 2  $\mu\text{M}$  for  
817 asexual blood stages or 5  $\mu\text{M}$  for stage IV/IV gametocytes and liver stages) based on disease  
818 area as defined in the MMV PRB. Bars are delineated to show activity distribution. ABS =  
819 asexual blood stages, GC = stage IV/IV gametocytes, L= liver stage. **(C)** Stratification of hits  
820 based on biological activity or target indicator. Protein targets / metabolic pathways were  
821 identified based on the descriptions of compounds with known activity in the MMV PRB in  
822 other disease systems. FT: farnesyltransferase inhibitors; GPCR: G-protein coupled  
823 receptors; S1P: sphingosine-1-phosphate receptor modulators, CYP: cytochrome inhibitors;

824 ETC: electron transport chain, DHFR: dihydrofolate reductase, DHODH: dihydroorotate  
825 dehydrogenase.

826

827 **Figure 3: Active compounds on multiple stages of *Plasmodium* development after dose**

828 **response evaluation and cytotoxicity filtering. (A)** Venn diagram of the number of

829 compounds identified with activity (inhibitory concentration,  $IC_{50}$ ) below 2  $\mu$ M, for which no

830 cytotoxicity was identified on either CHO cells (>50% viability at 2  $\mu$ M or selectivity index >10)

831 or HepG2 cells (selectivity index >10). **(B)** A total of 2 compounds with activity against all life

832 cycle stages tested: Birinapant and AZD-0159. Asexual blood stage activity (ABS) was

833 determined against both drug sensitive (NF54) and drug resistant (Dd2) *P. falciparum*. GC: *P.*

834 *falciparum* stage IV/IV gametocytes. Toxicity indicated both at CC50 (cytotoxic concentration)

835 against HepG2 cells as well as for viability of CHO cells remaining after 2  $\mu$ M treatment. MMV

836 codes related to compound codes provided in the box. Data are from at least three

837 independent biological repeats, performed with minimum technical duplicates,  $\pm$  S.E.

838

839 **Figure 4: Asexual blood stage active compounds from the MMV PRB in relation to**

840 **malaria clinical drugs.** MMV PRB compounds active against asexual blood stage (ABS)

841 parasites of *P. falciparum*. Compounds with inhibitory concentrations ( $IC_{50}$ ) below 2  $\mu$ M were

842 identified as hits against either *Pf*NF54 or *Pf*Dd2. MMV PRB hits are represented in the

843 Launched Drugs chemical space (beige) in comparison to Malaria Clinical Drugs (blue dots).

844 Asexual blood stage actives with  $IC_{50}$  values <2  $\mu$ M are indicated in red, gametocyte actives

845 and liver stage actives (all at the same cut-off) are indicated in green and black, respectively,

846 with different dot diameters to highlight compounds active on multiple stages. The 16 asexual-

847 specific compounds are labelled with Compound ID, asexual stage  $IC_{50}$  and structure and

848 other compounds of interest just by name and  $IC_{50}$ . CQ: chloroquine, TQ: tafenoquine.

849

850 **Figure 5: Active compounds from the MMV PRB against *P. falciparum* stage IV/IV**

851 **gametocytes. (A)** Chemical cluster analysis of the gametocyte hit compounds, using the

852 *FragFP* descriptor and a Tanimoto similarity index >0.50 in OSIRIS DataWarrior v 5.0.0, and

853 network construction with Cytoscape v 3.7.2. Edges were assigned between similar scaffolds

854 and a parent node. Active compounds with  $IC_{50}$  values <2  $\mu$ M are indicated in green, those

855 with additional activity at the same cut-off on ABS are indicated with hexagons and those with

856 shared activity on liver stages with black borders. Structures are highlighted for selected

857 compounds. **(B)** Dose-response of MmpL3 type inhibitors MMV687273 (SQ109, black lines)

858 and the rimonabant derivative MMV1580843 (grey lines), tested on stage IV/IV gametocytes

859 after 12, 24 or 48 h drug pressure (PrestoBlue<sup>®</sup> assay). **(C)** The % inhibition of stage IV/IV

860 viability under 2  $\mu$ M pressure of MMV687273 (SQ109) compared to MMV180402 (2-



861 adamantanamine) or the parent compound ethambutol (MMV687801, S,S-ethambutol and its  
862 HCl derivative). **(D)** Gametocyte-specific compounds were enriched for azole antifungals,  
863 including MMV1634491 and MMV1634492, with dose-responses of these two compounds  
864 indicated after 48 h exposure to stage IV/V gametocytes and evaluated on the PrestoBlue®  
865 assay. Data are from three independent biological repeats, each performed in technical  
866 triplicates, ± S.E.

867

868 **Figure 6: Confirming the transmission-blocking activity of gametocytocidal**  
869 **compounds in the MMV PRB. (A)** 18 compounds with activity against *P. falciparum* stage  
870 IV/V gametocytes were evaluated for their ability to inhibit male gamete exflagellation.  
871 Compounds (2 µM) were either used on stage IV/V gametocytes for a 48 h treatment prior to  
872 inducing male gamete exflagellation (carry-over format) or were directly added during  
873 induction of exflagellation (20 min incubation). Exflagellation was induced with 100 µM  
874 xanthurenic acid and 20% human serum, (A+ male) and exflagellating centers semi-  
875 automatically quantified from 15 videos of 8-10 seconds each 15 and 22.5 min after incubation,  
876 under 10x magnification. Data are from at least two independent biological repeats, performed  
877 in technical triplicates, ± S.E. **(B)** SMFA data for 16 compounds (selected based on >50%  
878 inhibition on male gamete exflagellation). SMFA was performed by feeding *An. coluzzii*  
879 mosquitoes with compound-treated gametocyte cultures (48 h treatment at 2 µM). Data are  
880 presented as % of TRA (transmission-reducing activity, reduction in oocyst intensity) or %  
881 TBA (transmission-blocking activity, reduction in prevalence) from at least three independent  
882 biological repeats, performed with technical duplicates, ± S.E.

883

884

N=400

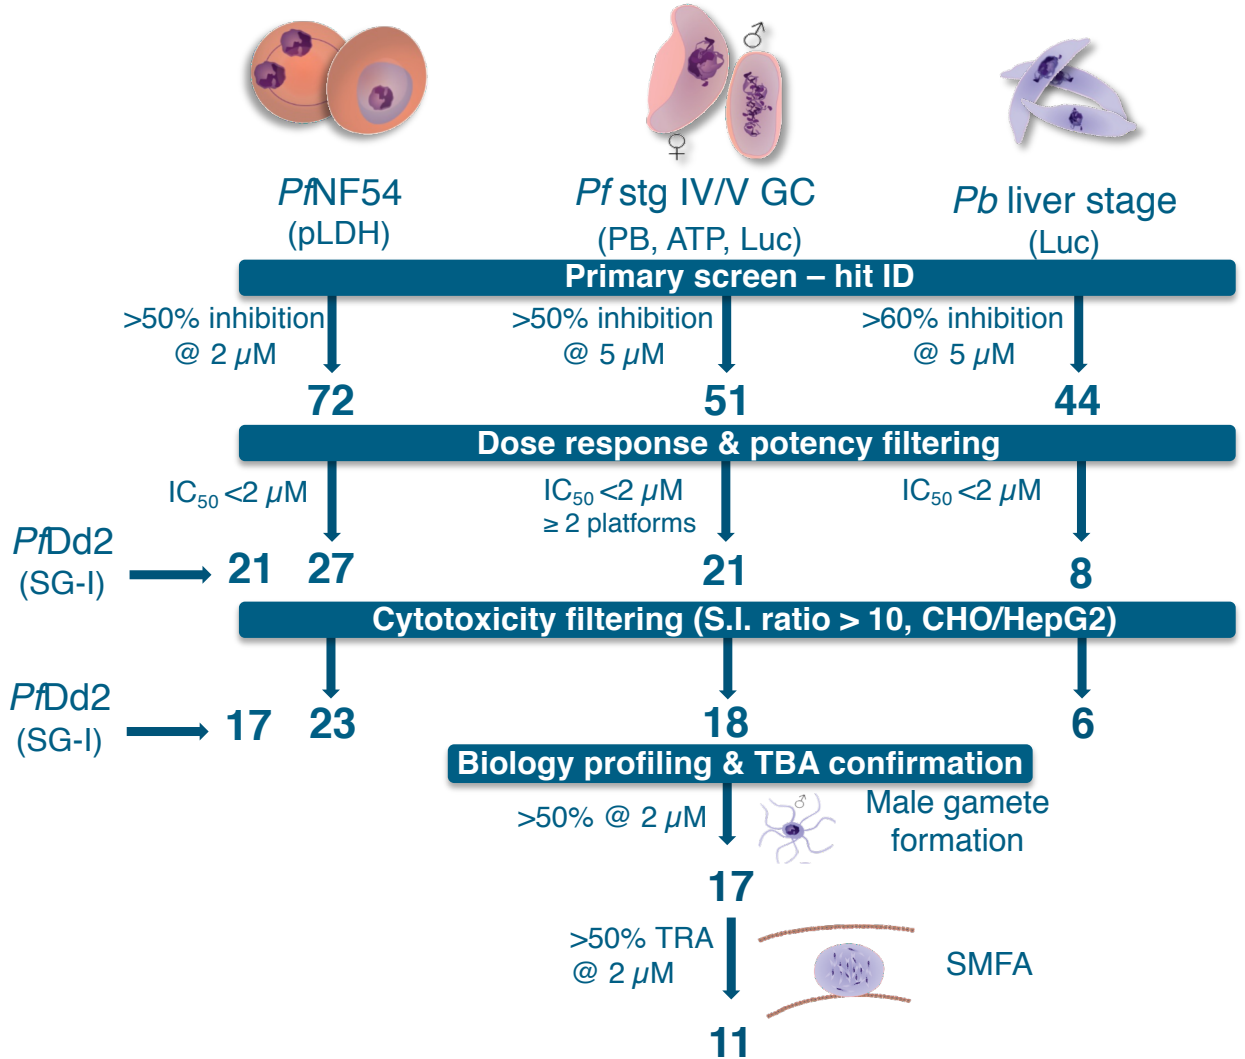

Figure 1

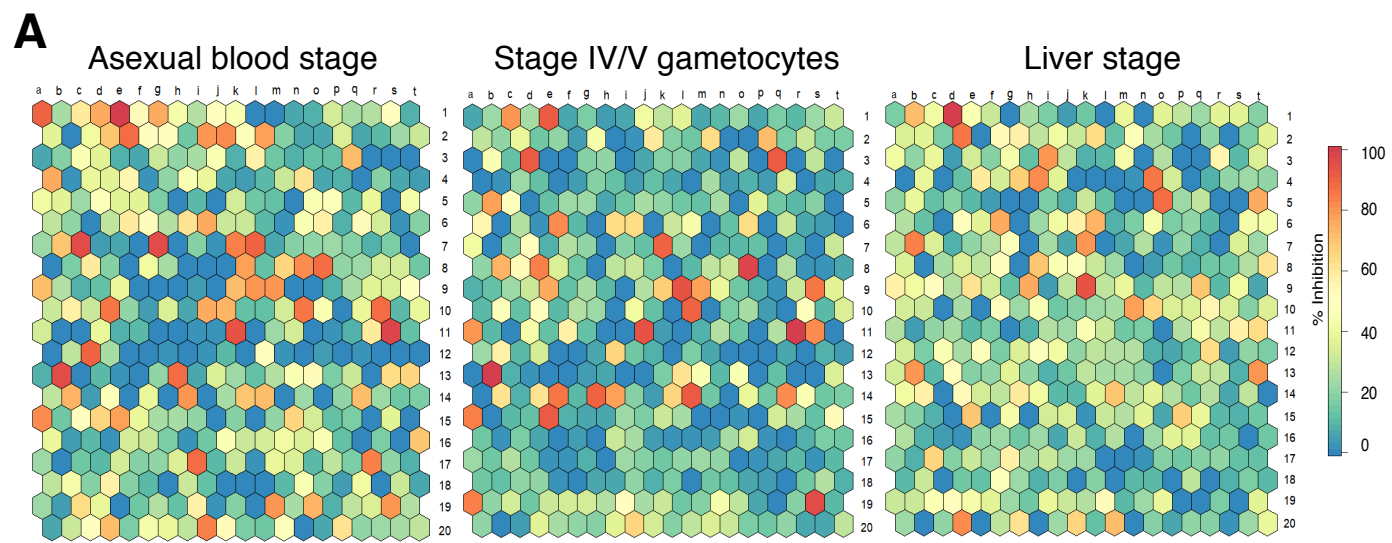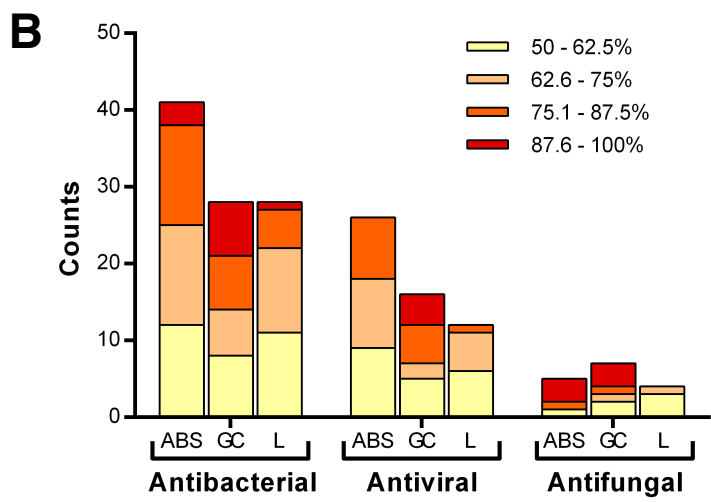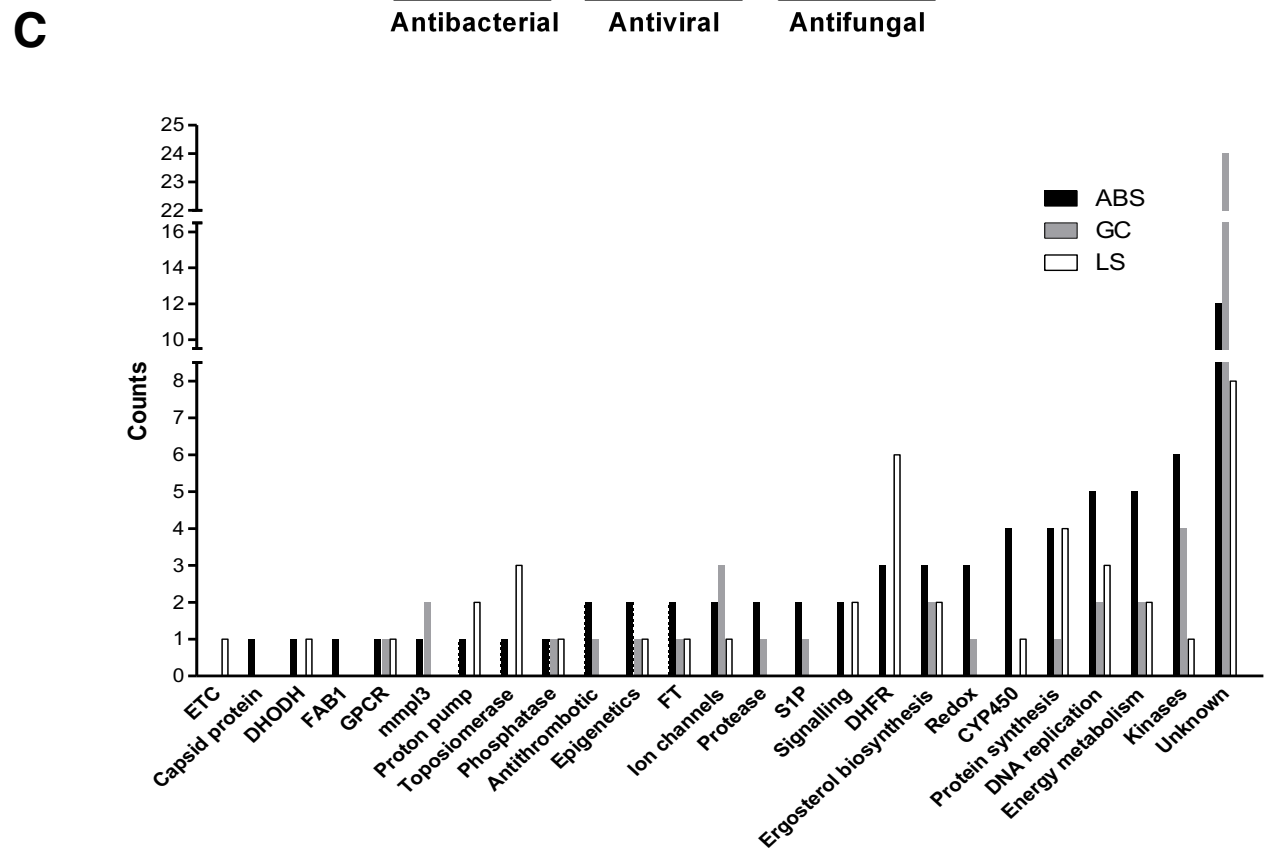

Figure 2

**A**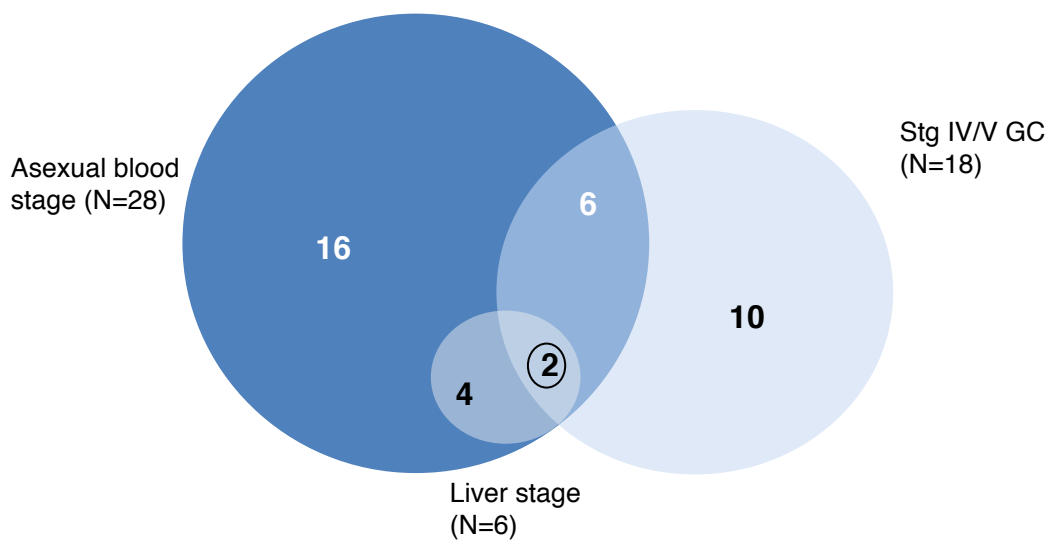**B**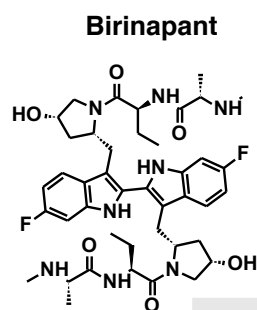**MMV1557856**

|                                             |                |
|---------------------------------------------|----------------|
| IC <sub>50</sub> ABS <i>PfNF54</i> (μM)     | 0.986 ± 0.055  |
| IC <sub>50</sub> ABS <i>PfDd2</i> (μM)      | 0.236 ± 0.2    |
| IC <sub>50</sub> <i>Pf</i> stg IV/V gc (μM) | 0.135 ± 0.0009 |
| IC <sub>50</sub> <i>Pb</i> liver stage (μM) | 0.128 ± 0.011  |
| CC <sub>50</sub> HepG2 (μM)                 | >5.0           |
| % viability CHO (2 μM)                      | 117            |

**AZD-0156**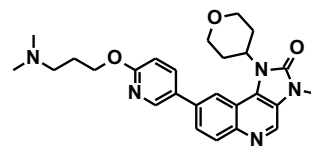**MMV1580483**

|                                             |                |
|---------------------------------------------|----------------|
| IC <sub>50</sub> ABS <i>PfNF54</i> (μM)     | 3.998 ± 0.799  |
| IC <sub>50</sub> ABS <i>PfDd2</i> (μM)      | 0.776 ± 0.079  |
| IC <sub>50</sub> <i>Pf</i> stg IV/V gc (μM) | 0.236 ± 0.0008 |
| IC <sub>50</sub> <i>Pb</i> liver stage (μM) | 0.240          |
| CC <sub>50</sub> HepG2 (μM)                 | >5.0           |
| % viability CHO (2 μM)                      | 76             |

**Figure 3**

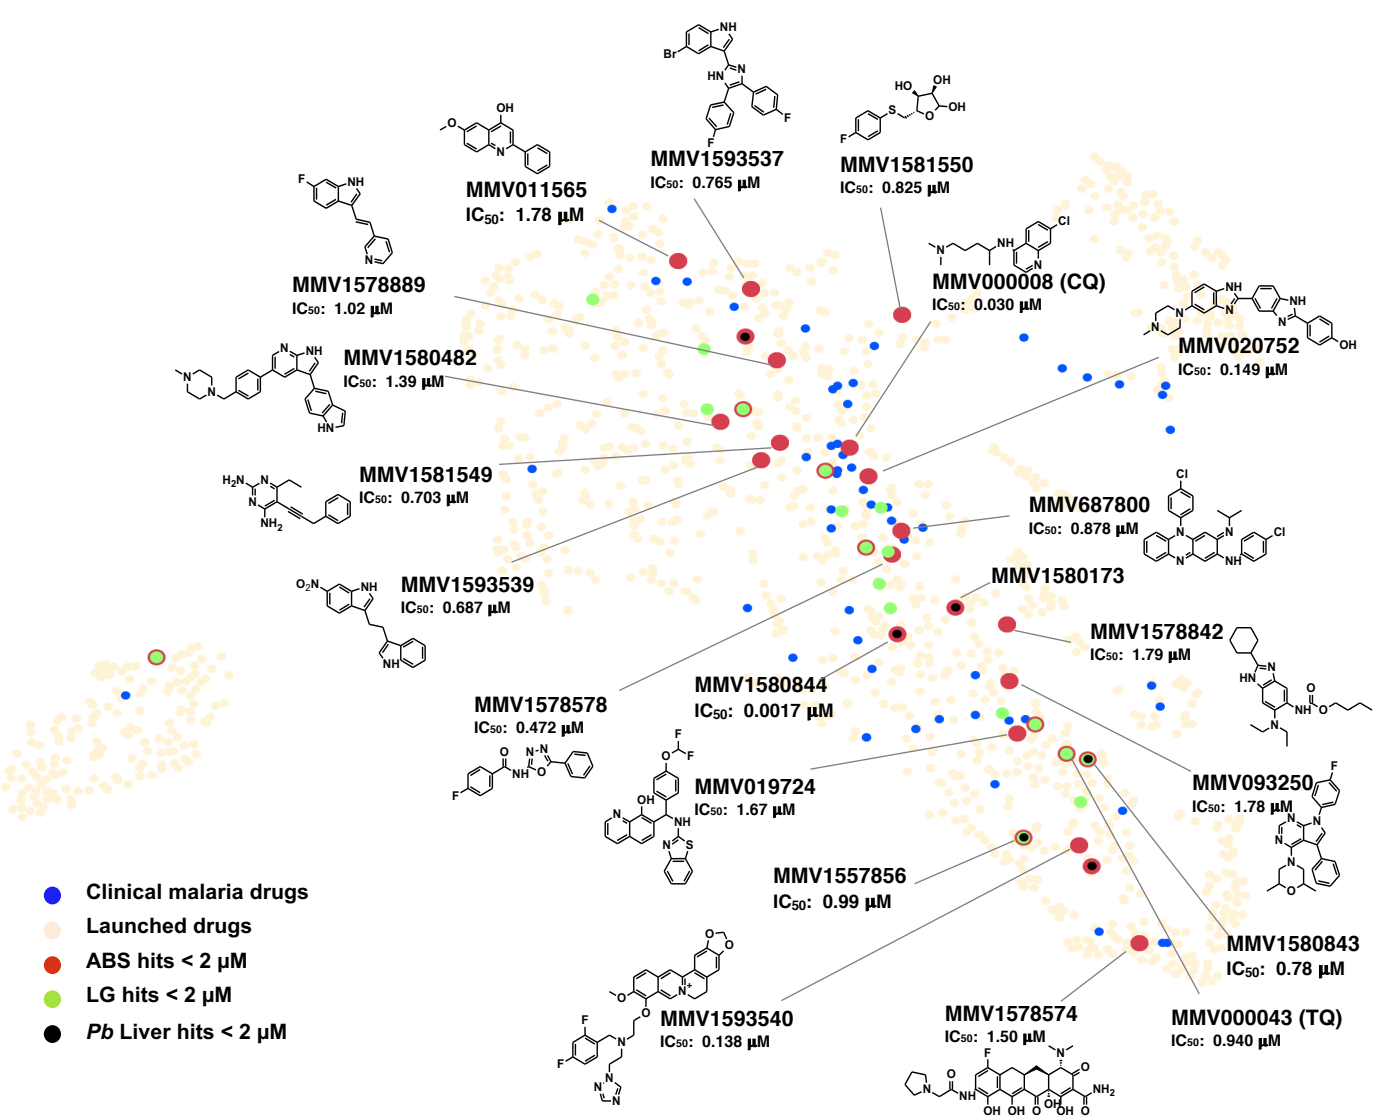

Figure 4

**A**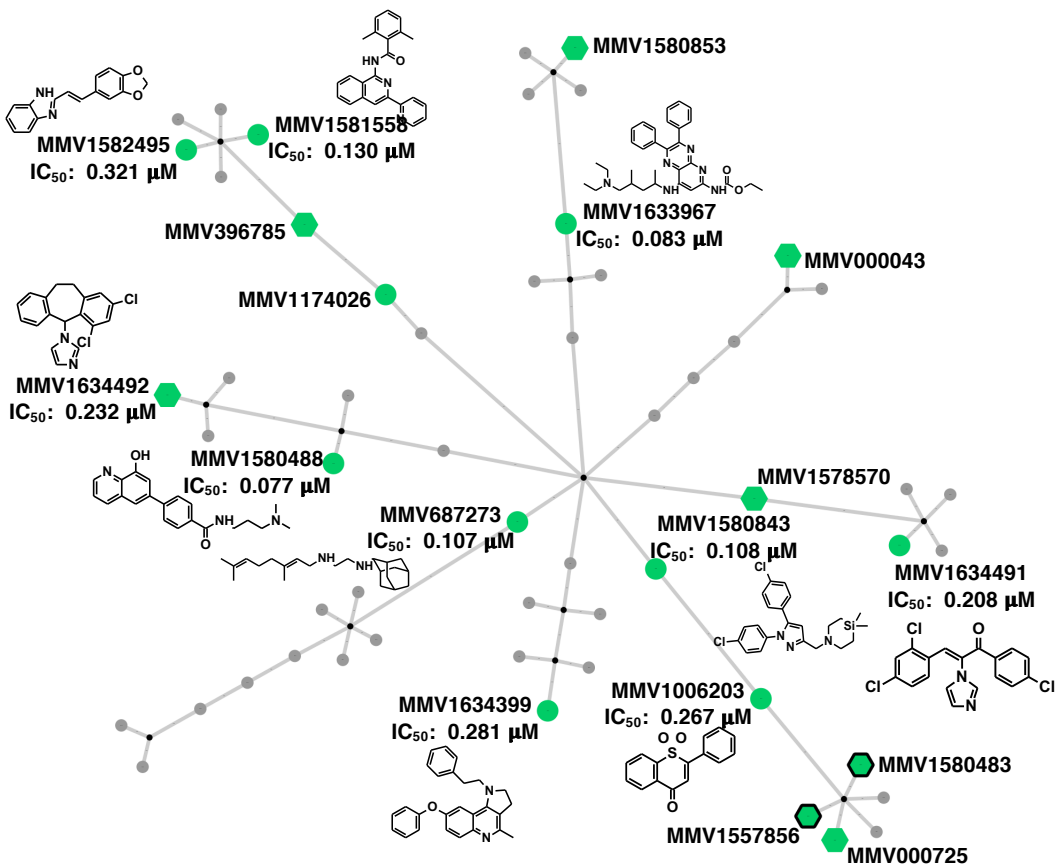**B**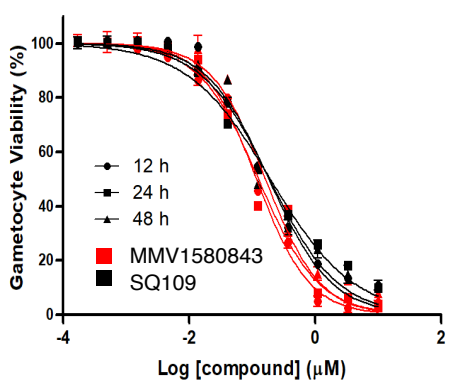**C**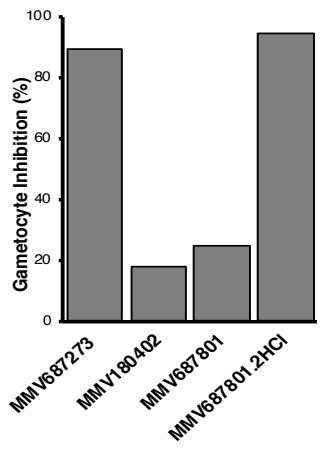**D**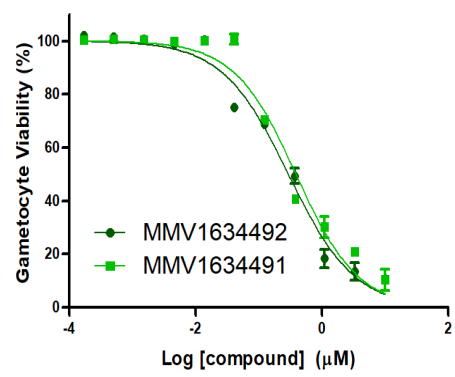**Figure 5**

**A**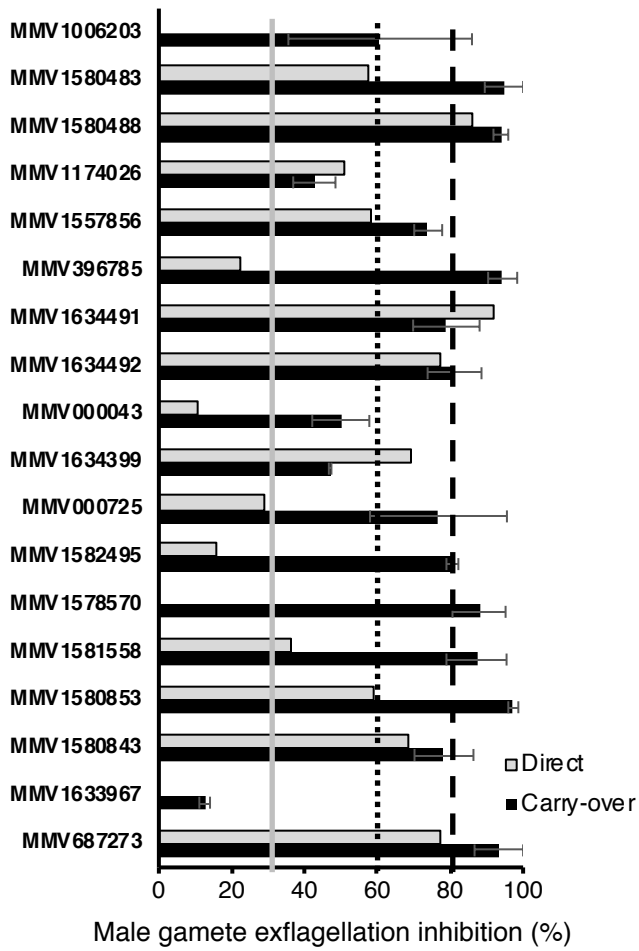**B**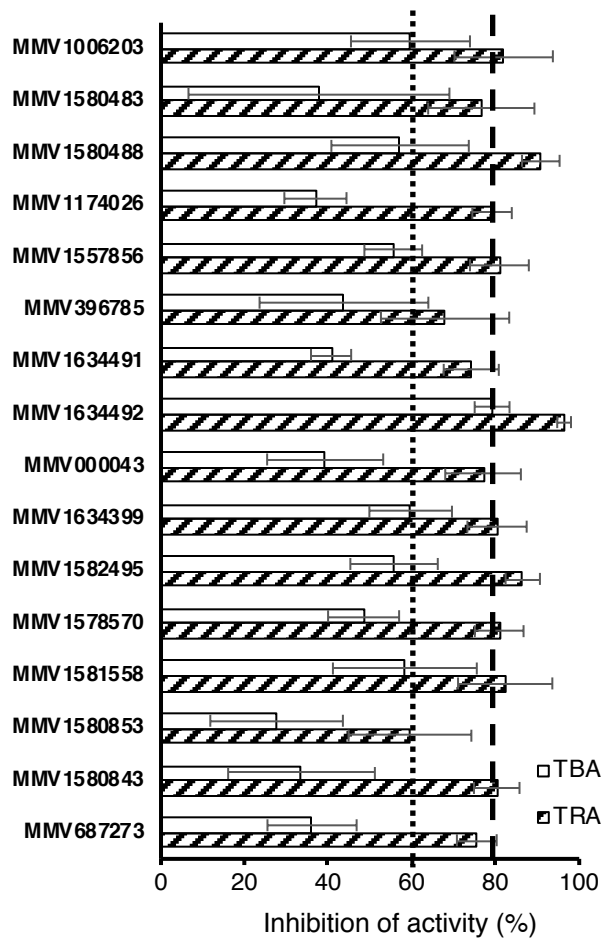

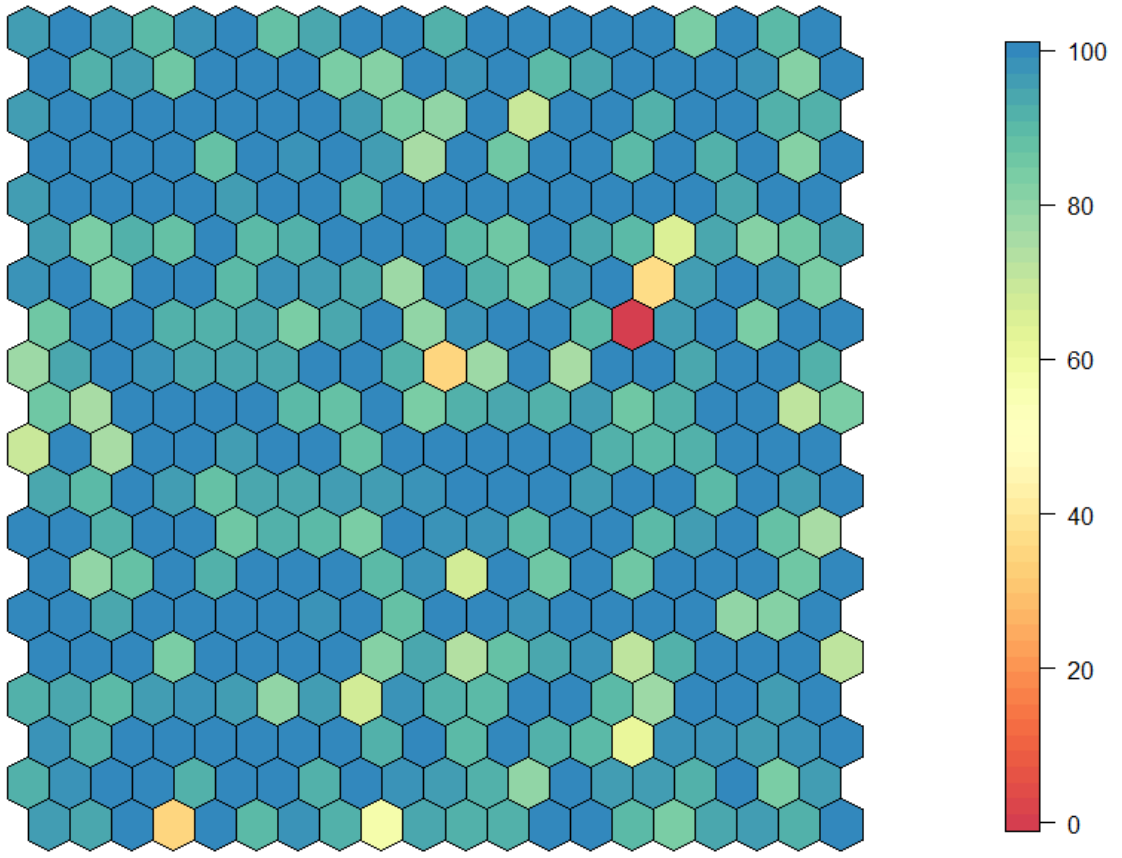

Figure S1: Hexoplots for % inhibition of compounds at 2 uM on CHO cells. Figure supplementary to Figure 2A.



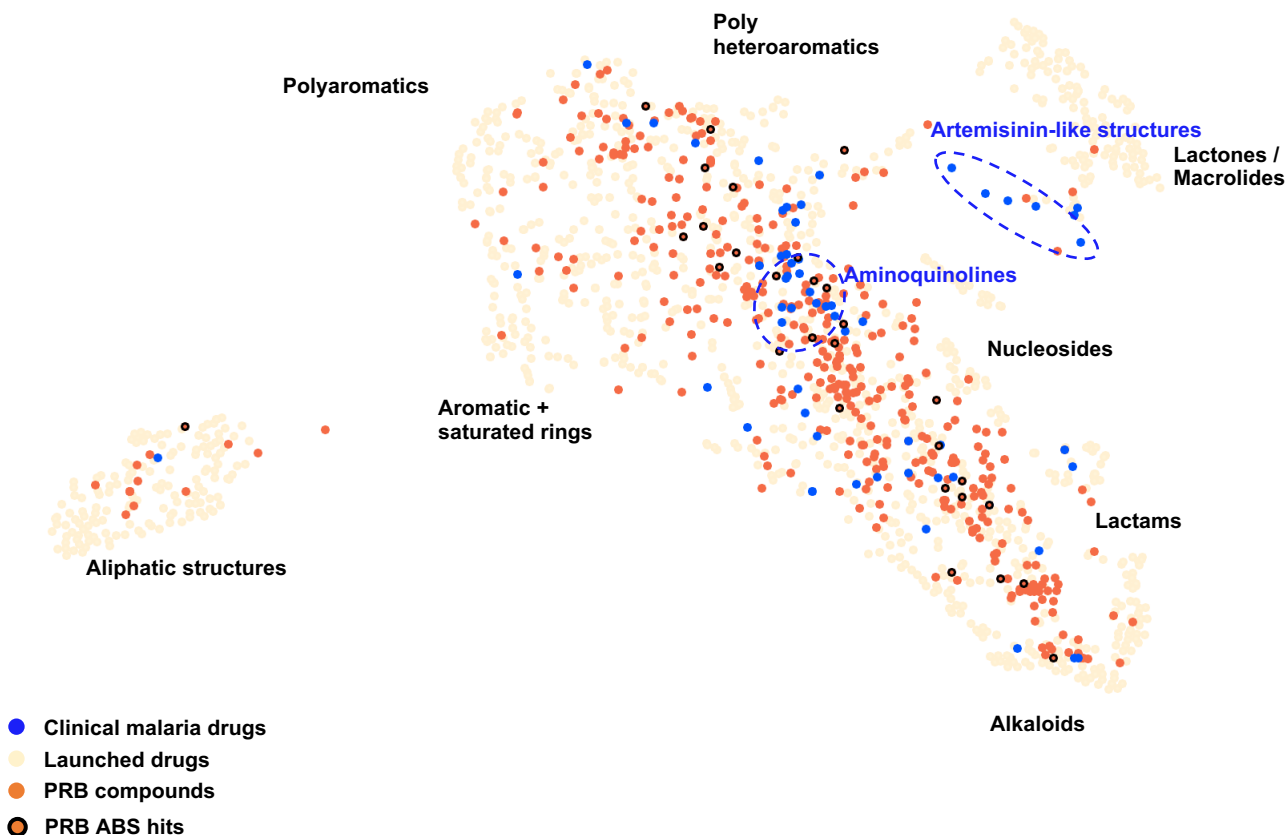

Figure S2: Structural diversity of the MMV PRB compared to Malaria Clinical Drugs. MMV PRB (red dots) and Malaria Clinical Drugs (blue dots) chemical spaces are plotted in the Launched Drugs Space (beige dots).

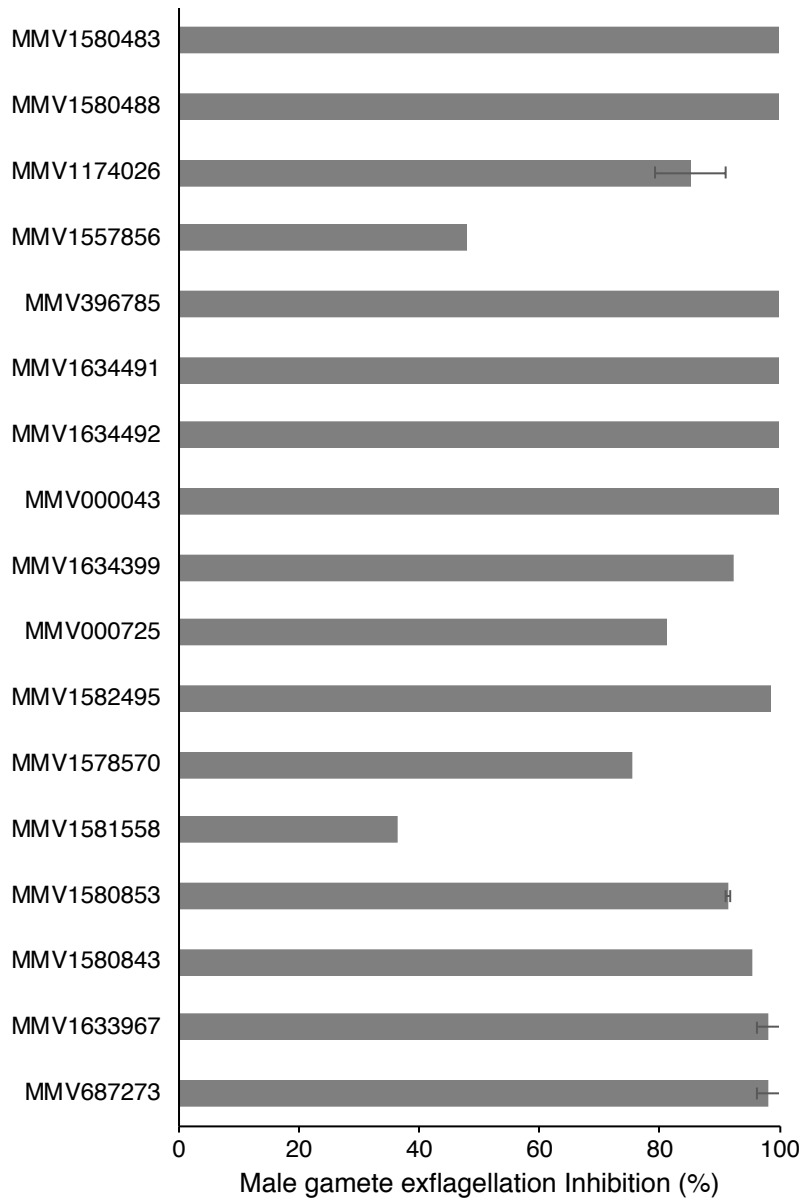

Figure S3: Inhibition of male gamete exflagellation in washout format. Figure supplementary to Figure 5A.

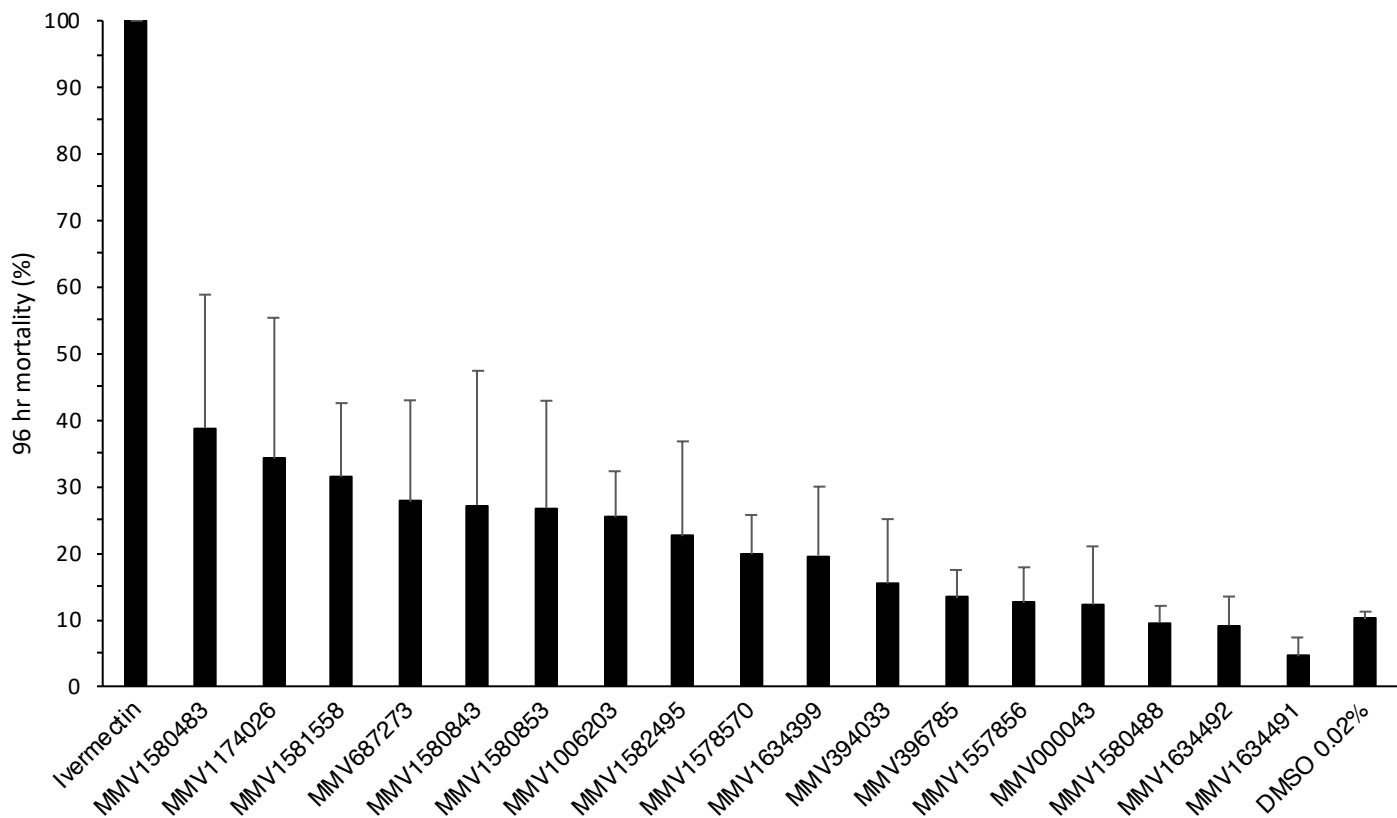

Figure S4: Endectocidal activity of 17 compounds with gametocytocidal activity. Compounds were screened at  $2 \mu\text{M}$  and mortality of *An. coluzzii* (G3) determined after 4 days, compared to Ivermectin ( $2 \mu\text{M}$ ) as drug control, with DMSO (0.02%) as vehicle control. Data are from  $\geq 2$  independent biological repeats,  $\pm$  S.E.
